1 **Prospects of telomere-to-telomere assembly in barley: analysis of sequence gaps in the**  
2 **MorexV3 reference genome**

3

4 Pavla Navrátilová<sup>1,\*</sup>, Helena Toegelová<sup>1,\*</sup>, Zuzana Tulpová<sup>1</sup>, Yi-Tzu Kuo<sup>2</sup>, Nils Stein<sup>2,3</sup>,  
5 Jaroslav Doležel<sup>1</sup>, Andreas Houben<sup>2</sup>, Hana Šimková<sup>1</sup>, Martin Mascher<sup>2,4</sup>

6

7 <sup>1</sup>Institute of Experimental Botany of the Czech Academy of Sciences, Centre of the Region  
8 Haná for Biotechnological and Agricultural Research, Olomouc, Czech Republic

9 <sup>2</sup>Leibniz Institute of Plant Genetics and Crop Plant Research (IPK) Gatersleben, Seeland,  
10 Germany

11 <sup>3</sup>Center for Integrated Breeding Research (CiBreed), Georg-August-University Göttingen,  
12 Göttingen, Germany

13 <sup>4</sup>German Centre for Integrative Biodiversity Research (iDiv) Halle-Jena-Leipzig, Leipzig,  
14 Germany

15

16 \*These authors contributed equally.

17

18 Correspondence should be addressed to Hana Šimková ([SimkovaH@ueb.cas.cz](mailto:SimkovaH@ueb.cas.cz)) or Martin  
19 Mascher ([mascher@ipk-gatersleben.de](mailto:mascher@ipk-gatersleben.de))

20

21 **Abstract**

22

23 The first gapless, telomere-to-telomere (T2T) sequence assemblies of plant chromosomes  
24 were reported recently. However, sequence assemblies of most plant genomes remain  
25 fragmented. Only recent breakthroughs in accurate long-read sequencing have made it  
26 possible to achieve highly contiguous sequence assemblies with a few tens of contigs per  
27 chromosome, i.e. a number small enough to allow for a systematic inquiry into the causes of  
28 the remaining sequence gaps and the approaches and resources needed to close them.  
29 Here, we analyze sequence gaps in the current reference genome sequence of barley cv.  
30 Morex (MorexV3). Optical map and sequence raw data, complemented by ChIP-seq data for  
31 centromeric histone variant CENH3, were used to estimate the abundance of centromeric,  
32 ribosomal DNA and subtelomeric repeats in the barley genome. These estimates were  
33 compared with copy numbers in the MorexV3 pseudomolecule sequence. We found that  
34 almost all centromeric sequences and 45S ribosomal DNA repeat arrays were absent from  
35 the MorexV3 pseudomolecules and that the majority of sequence gaps can be attributed to  
36 assembly breakdown in long stretches of satellite repeats. However, missing sequences  
37 cannot fully account for the difference between assembly size and flow cytometric genome  
38 size estimates. We discuss the prospects of gap closure with ultra-long sequence reads.  
39

## 40 Introduction

41

42 The recent advances in genome sequencing and assembly methodology have enabled the  
43 gap-less reconstructing of the sequences of entire eukaryotic chromosomes. Telomere-to-  
44 telomere (T2T) assemblies have been reported for one maize chromosome (Liu et al., 2020),  
45 five banana chromosomes (Belser et al., 2021) and the human genome (Logsdon et al.,  
46 2021; Miga et al., 2020; Nurk et al., 2021). T2T assembly requires the use of complementary  
47 sequence and mapping resources for primary contig assembly, scaffolding and gap closure.  
48 For example, Logsdon et al. (2021) used a combination of accurate long reads (PacBio HiFi)  
49 and ultra-long nanopore reads for sequence assembly and, among other resources, a  
50 Bionano optical map and manually curated sequences of bacterial artificial chromosome  
51 (BAC) clones for validation. These resources were generated and analyzed with the express  
52 purpose of closing all remaining gaps in the sequence of human chromosome 8, with a  
53 particular focus on completing the sequence of centromeric satellite repeat arrays. By  
54 contrast, reference genome projects in crops did not focus on T2T sequence but rather  
55 aimed at near-complete gene space representation, chromosome-scale contiguity at the  
56 scaffold level, and reasonable representation of the repeat space. The expenditure and  
57 effort required to achieve these goals has decreased drastically in recent years as sequence  
58 reads became longer and more accurate and powerful scaffolding methods such as optical  
59 genome mapping and chromosome-conformation capture sequencing (Hi-C) were  
60 developed. Even for plant species with large, heterozygous or autopolyploid genomes, near-  
61 complete chromosome-scale sequence assembly has become possible (Sun et al., 2021;  
62 Zhang et al., 2019; Zhou et al., 2020).

63 Whether it is possible and how much effort it will take to turn a “near-complete” into a  
64 finished sequence assembly of a plant genome have become pertinent questions. The  
65 report of Liu et al. (2020) illustrates that T2T assembly is not impossible, but also not easy:  
66 even with a combination of long-read technologies and optical mapping, the centromeric  
67 sequence of only a single maize chromosome could be completed. As of today, all plant  
68 reference genome sequences, even that of *Arabidopsis thaliana*, have gaps (Naish et al.,  
69 2021). An assessment of what is missing in current plant reference genomes is a timely  
70 undertaking. Before embarking on the quest for a T2T assembly, it should be ascertained as  
71 best as possible with the resources at hand which challenges will have to be overcome and  
72 which additional datasets are needed to achieve gapless assemblies of entire chromosomes.  
73 The genome of barley (*Hordeum vulgare* L.) is a good model to study the prospects of T2T  
74 assembly in plant because (i) it has a high-quality reference sequence assembly and (ii)  
75 much is known about its repeats. Mascher et al. (2021) used accurate long-read sequencing  
76 (PacBio HiFi), Bionano optical mapping and chromosome-conformation capture sequencing  
77 (Hi-C) to construct the latest barley reference sequence (MorexV3), which surpasses the  
78 older versions MorexV1 (Mascher et al., 2017) and MorexV2 (Monat et al., 2019) in gene  
79 space completeness and the representation of recently inserted transposable elements  
80 (Mascher et al. 2021). Accurate long reads spanning entire elements of the predominant  
81 retrotransposon families have reduced the number of sequence gaps in the  
82 pseudomolecules from hundreds of thousands in the MorexV1 and MorexV2 short-read  
83 assemblies to only 147, of which 51 were spanned by contigs of a Bionano optical map.

84 A meaningful assessment of missing sequence in near-complete genome assemblies  
85 requires knowledge about the repeat composition that is independent of sequence  
86 assemblies. Over the past decades, scientists have studied the extent and arrangement of

87 barley telomeres (Kilian et al., 1995; Röder et al., 1993), subtelomeres (Belostotsky and  
88 Ananiev, 1990a; Brandes et al., 1995; Röder et al., 1993), centromeres (Houben et al., 2007;  
89 Hudakova et al., 2001; Presting et al., 1998) and ribosomal DNA (rDNA) loci (Leitch and  
90 Heslop-Harrison, 1992; Leitch and Heslop-Harrison, 1993) using cytological and molecular  
91 biology techniques. Large and homogeneous repeat arrays constituting these functional loci  
92 are prime candidates for difficult-to-assemble sequences missing from the current barley  
93 reference sequence assembly as suggested by our previous analysis of subtelomeric and 45S  
94 rDNA repeats (Kapustová et al. 2019). Here, we conduct an in-depth analysis of the  
95 representation of repeat arrays in the latest reference sequence assembly of barley cv.  
96 Morex and its underlying raw data. Our results indicate functional genomic loci of barley  
97 such as centromeres and ribosomal DNA clusters can be assembled only if and when  
98 sequence reads longer than 100 kb or even 1 Mb become available.

99

## 100 **Results**

101

102 We based our analyses on the current reference genome sequence assembly of barley cv.  
103 Morex (MorexV3, Mascher et al. (2021)) and several publicly available short-read and long-  
104 read datasets (**Table 1; Supplementary Figures 1-3**), a genome-wide Bionano optical map  
105 and newly generated chromatin immunoprecipitation sequencing (ChIP-seq) data for  
106 centromere histone H3 (CENH3). Using these data, we compared estimates of genome size  
107 from different sequence datasets with those from flow cytometry and quantified missing  
108 sequences at (sub-) telomeric satellites, centromeric repeats, ribosomal DNA and other  
109 satellite repeats.

110

### 111 *Discrepancy between genome size estimates*

112

113 A simple approach to assess the completeness of a genome sequence assembly is to  
114 compare the size of the assembly with the estimated size of the whole genome. To date, the  
115 only DNA sequence-independent methods that have been used to estimate genome size in  
116 plants are Feulgen microspectrophotometry and flow cytometry. Due to the ease of use and  
117 higher throughput, flow cytometry gradually replaced the former approach (Doležel and  
118 Bartoš, 2005). Flow cytometric estimations of haploid (1C) DNA amounts of *H. vulgare*  
119 ranged from 3.64 pg (Marie and Brown, 1993) to 5.47 pg (Vaikonen, 1994), corresponding to  
120 3.559 Gb - 5.349 Gb. Both microspectrophotometric and flow cytometric assays need a  
121 reference standard with known genome size (Doležel and Bartoš, 2005) and as there is  
122 currently no plant or animal species with known genome size that is suitable as a reference  
123 standard, all published data are based on genome sizes arbitrarily assigned to the standards.  
124 This is one of the reasons why the estimates for the same species may differ between  
125 studies (Doležel and Greilhuber, 2010). Recently, Doležel et al. (2018) estimated 1C genome  
126 size of barley cv. Morex as 4.88 Gb and 5.04 Gb, respectively, using human leukocytes as the  
127 primary reference standard, considering two different values for the human genome size.

128 The seven pseudomolecules of the MorexV3 assembly amount to 4.196 Gb, with 29.1 Mb in  
129 unplaced contigs. The preceding versions MorexV1 (Mascher et al., 2017) and MorexV2  
130 (Monat et al., 2019) were longer than MorexV3, with assembly sizes of 4.834 Gb and 4.343  
131 Gb, respectively. However, both MorexV1 and MorexV2 suffered from limitations of short-  
132 read assembly that have led to overestimated assembly sizes. MorexV1 harbored redundant  
133 sequences because of incomplete merging of fragmented sequence assemblies of

134 overlapping bacterial artificial chromosome (BAC) clones. In MorexV2, gap sizes in scaffolds  
135 constructed from mate-pair reads may have been mis-estimated (Monat et al., 2019). The  
136 assembly size of MorexV3 may be lower than the true genome size because accurate long  
137 reads may suffer from sequence dropout in long low-complexity G/A- or T/C-rich regions  
138 (Nurk et al., 2020).

139 Assembly-free genome size estimates (GSEs) are commonly obtained by evaluating  $k$ -mer  
140 frequency spectra computed from high-throughput sequencing data. The original method  
141 proposed by Li and Waterman (2003) has been refined by tools such as GenomeScope  
142 (Vurture et al., 2017) and findGSE (Sun et al., 2018). We used findGSE with different  $k$ -mer  
143 sizes (21, 51, 101) on (1) PacBio HiFi circular consensus reads (HiFi); (2) Oxford Nanopore  
144 (ONT) reads and (3) paired-end short reads (2x250bp, PCR-free) from 450 bp fragments  
145 (PE450). The HiFi and ONT datasets were by Mascher et al. (2021); the PE450 data by Monat  
146 et al. (2019). At  $k=51$ , HiFi and PE450 yielded concordant results with GSEs in the range of  
147 4.2 Gb and 4.3 Gb, respectively (**Table 1**). At  $k=21$ , estimates for both datasets were lower,  
148 indicating that GSEs in barley are influenced by the choice of  $k$ -mer size. ONT reads gave no  
149 meaningful estimate at  $k=21$ ; the use of a larger  $k$  was not feasible due to the high error  
150 rate.

151 An alternative method to infer genome sizes is based on the average coverage in read  
152 alignments to assemblies (Pfenninger et al., 2021): 10 Gb of shotgun reads from a 1 Gb  
153 genome will result in an average 10-fold read depth. When this argument is reversed, we  
154 can infer from a 10x average coverage for 10 Gb of shotgun reads a genome size of 1 Gb.  
155 We aligned HiFi, PE450, and ONT reads to the MorexV3 pseudomolecules and summarized  
156 read depths and calculated GSEs (**Table 1**). Estimates from short reads and accurate long  
157 reads were in the range of those derived from  $k$ -mer spectra and similar to the MorexV3  
158 assembly size. The estimate from the uncorrected ONT reads (5 Gb) was close to the higher  
159 flow cytometric estimate (5.04 Gb) by Doležel and Greilhuber (2010). However, we found  
160 that 9.3 % of the ONT reads aligned to the barley chloroplast (cp) genome for  $\geq 90$  % of their  
161 length. ONT reads matching to the cp genome amounted to 29.5 Gb, which, if truly  
162 originating from the nuclear genome, would be equivalent to 347 Mb of plastid DNA  
163 insertions amounting to about half a barley chromosome. However, fluorescence *in situ*  
164 hybridization (FISH) with a probe specific for barley cpDNA did not support the presence of  
165 large (> 100 kb) cpDNA insertions into the nuclear genome of barley cv. Morex: only rather  
166 weak hybridization signals, about as strong as those of labelled cDNA clones (Aliyeva-  
167 Schnorr et al., 2016), were seen on chromosomes 2H and 5H (**Fig. 1**). Both chromosomes  
168 were identified based on the distribution of the 45S rDNA and subtelomeric satellite repeat  
169 HvT01 (Szakács and Molnár-Láng, 2007). Hence, the DNA preparations for ONT sequencing  
170 were likely contaminated with cpDNA. After introducing a correction factor into our  
171 coverage calculation, we arrived at a coverage-based genome size estimate of 4.7 Gb.

172 Previous studies have reported discrepancies between flow cytometric and sequence-based  
173 GSEs, although the reasons have remained unclear (Pflug et al., 2020). In the following, we  
174 analyze candidates for difficult-to-assemble loci to understand if gaps in the genome  
175 assembly can account for the large difference (up to hundreds of Mb or 10 % of the  
176 genome) between various flow cytometric estimates and MorexV3 assembly size.

177

178 *Telomeric satellite arrays are not captured in their entirety by long reads*

179

180 Telomeres of barley chromosomes consist of thousands of TTTAGGG repeat copies (Kilian et  
181 al., 1995). To assess the completeness of the MorexV3 pseudomolecules (Mascher et al.,  
182 2021) at the chromosomal ends, we aligned the pseudomolecules to the Morex Bionano  
183 optical map, which revealed missing sequences at the termini of all short arms and of three  
184 long arms (**Table 2, Fig. 2**). The missing segments at short arm termini were generally longer  
185 (17-220 kb) than those in the long arms (10-80 kb). It is to be noted that the truly missing  
186 sequence at the chromosomal ends is larger than these estimates since the optical map is  
187 likely incomplete in the terminal regions because DLE-1 recognition sites, required for  
188 labelling molecules in optical mapping, are absent from telomeric and most subtelomeric  
189 repeats. Search for the TTTAGGG motif in the pseudomolecules revealed continuous arrays  
190 of 3.6-13.7 kb at three long-arm termini and discontinuous arrays interspersed by other  
191 sequences at the ends of two additional arms. Interestingly, all partially assembled arrays of  
192 telomeric repeats were on long arms while all short arms missed relatively large segments  
193 at their termini. A similar trend was observed in the long-read B73 RefGen v4 assembly of  
194 maize (Jiao et al., 2017) where a part of a telomeric array has been assembled in seven out  
195 of ten long arm ends but only two of the short arms. A possible explanation are differences  
196 in the copy number and homogeneity of subtelomeric repeats between long and short  
197 arms.

198 To complement this analysis, we investigated telomeric satellite repeats in the PacBio HiFi  
199 and ONT long reads that were used to construct the MorexV3 pseudomolecules (Mascher et  
200 al., 2021). Tandem Repeat Finder (TRF) was used to annotate arrays of tandem repeats and  
201 satellites on all individual read sequences. We found that ONT reads with TTTAGGG arrays  
202 longer than 1 kb were mapped to distal ends of only three chromosome arms (2HL, 3HL,  
203 5HL, **Fig. 3a**). TTTAGGG arrays were also found in the distal 2 Mb of 3HS and 7HL, but not at  
204 the very end of the pseudomolecule sequence, indicating either the presence of interstitial  
205 arrays or errors in sequence orientation. More than half of reads (51 %) with TTTAGGG  
206 arrays > 1 kb matched to unanchored contigs. Arrays longer than 1 (10) kb were found in a  
207 total of 1848 (452) ONT reads. The average size of TTTAGGG arrays  $\geq$  1kb was 6.9 kb; the  
208 longest TTTAGGG array annotated in an ONT read spanned 37.2 kb. As this read was entirely  
209 composed of TTTAGGG motifs, the length of the complete array it belongs to is unknown.  
210 The cumulative size of TTTAGGG arrays longer than 1 kb annotated on the ONT reads was  
211 13.0 Mb. Assuming an average 85-fold coverage with ONT reads, this amounts to an average  
212 of 11 kb of telomeric satellites per chromosome arm. This is shorter, but on the same order  
213 of magnitude, as the telomere size of ~22 kb estimated by terminal restriction fragment  
214 analysis (Kilian et al., 1995). We found only 44 TTTAGGG arrays longer than 1 kb in HiFi  
215 reads with a cumulative length of 317 kb, amounting to 741 bp of non-redundant sequence  
216 per telomere (assuming 31x genome coverage). This clear underestimate may be explicable  
217 by HiFi sequence dropout in GA-rich regions (Nurk et al., 2020).

218  
219 *Subtelomeric repeat arrays are disrupted by sequence gaps*

220  
221 To assess the representation of subtelomeric satellite repeats in the MorexV3 assembly, we  
222 studied two previously reported repeats, HvT01 and pAS1. The 118 bp subtelomeric repeat  
223 HvT01 was first reported by Belostotsky and Ananiev (1990a) and was mapped by FISH to  
224 the distal ends of all chromosome arms of barley (Schubert et al., 1998; Szakács and Molnár-  
225 Láng, 2007). Brandes et al. (1995) discovered pAS1, a 336 bp sequence with a preferentially  
226 subtelomeric localization.

227 We aligned the HvT01 and pAS1 consensus sequences to the HiFi reads using BLAST  
228 (Altschul et al., 1990) and selected near-complete alignments ( $\geq 110$  bp for HvT01;  $\geq 330$   
229 bp for pAS1). The mean length of HvT01 alignments was 20 kb, i.e. spanning entire reads.  
230 This indicates that HvT01 is present in long arrays. By contrast, the length of pAS1  
231 alignments was 6.6 kb on average. Plotting the alignment positions of reads positive for  
232 either HvT01 or pAS1 indicated that HvT01 is only found in very distal locations, whereas  
233 pAS1 is present throughout the chromosomes, albeit with a strong enrichment towards the  
234 distal ends (**Fig. 3b,c**).

235 We focused on reads that had alignments to either HvT01 or pAS1 with cumulative lengths  
236 of 1 kb or more. A total of 3,803 reads satisfied this criterion for HvT01, amounting to a  
237 cumulative alignment length of 97.6 Mb. Assuming 31-fold coverage with HiFi reads, the  
238 total size of HvT01 arrays is estimated at 3.1 Mb, i.e. on average 225 kb of HvT01 sequence  
239 per chromosome arm. A total of 158,607 reads contained long ( $> 1$  kb) alignments to pAS1  
240 with a cumulative length of 804 Mb, equivalent to a non-redundant sequence of 25.9 Mb  
241 (1.85 Mb per chromosome arm). We attempted to use also ONT reads for an independent  
242 estimation of subtelomeric repeat abundance, but observed a 5-10 fold difference in  
243 cumulative alignment length between identity cut-offs of 70 and 80 %, indicating that a high  
244 degree of sequence divergence relative to the consensus monomer prevents confident  
245 alignment to uncorrected long-reads.

246 Alignments of the consensus monomers of HvT01 and pAS1 to the MorexV3 assembly  
247 covered 3.7 Mb and 28.2 Mb of sequence, respectively – largely consistent with our  
248 estimates based on read depth. Only 134 kb (0.5 %) of the pAS1 sequence were matched to  
249 unanchored contigs (“chrUn”), while a substantial fraction (19.3 %, 707 kb) of HvT01 were  
250 assigned to chrUn. The likely reason is that long stretches of homogeneous HvT01 arrays led  
251 to ambiguities in the assembly graph, resulting in short contigs that could not be assigned to  
252 chromosomal locations.

253

#### 254 *Functional centromeres are absent from the pseudomolecules*

255

256 Independent of their underlying DNA sequences, functional centromeres of most species  
257 are defined by the presence of the centromere-specific histone H3 variant CENH3 (Talbert  
258 and Henikoff, 2020). The two main constituents of barley centromeres are the *Ty3/gypsy*-  
259 retrotransposon *cereba* and the AGAGGG satellite repeat (Hudakova et al., 2001; Presting et  
260 al., 1998). Chromatin immunoprecipitation (ChIP) for CENH3 showed that both *cereba* and  
261 AGAGGG satellites interact with CENH3 (Houben et al., 2007). We attempted to position  
262 centromeres in the MorexV3 sequence assembly without using prior knowledge of  
263 centromeric sequences, following two complementary approaches: the inspection of  
264 contact probability matrices and ChIP-sequencing (ChIP-seq). Contact probabilities were  
265 determined from chromosome conformation capture sequencing (Hi-C) data of cv. Morex  
266 (Mascher et al., 2017) and visualized as two-dimensional matrices recording the number of  
267 Hi-C links between pairs of genomic loci (Lieberman-Aiden et al., 2009). Contact matrices of  
268 all barley chromosomes showed a characteristic cross pattern with a strong main diagonal  
269 and a weaker anti-diagonal (**Fig. 4**). We had previously interpreted this pattern as a  
270 consequence of the Rab1 configuration of interphase nuclei (Mascher et al., 2017). The Rab1  
271 configuration refers to a clustering of centromeres and telomeres of all chromosomes  
272 during interphase, juxtaposing loci from opposite arms at the same relative distance from  
273 the centromere (Cowan et al., 2001; Rabl, 1885). As an alternative visualization of Hi-C data,

274 we used directionality indices recording imbalances in the number of upstream and  
275 downstream contacts along the genome (Dixon et al., 2012; Himmelbach et al., 2018). The  
276 midpoints of the “Rabl crosses” coincided with strong discontinuities in the directionality  
277 indices (**Fig. 4**), which we assume corresponded to the locations of functional centromeres.  
278 To support the assertion that this discontinuity marks the position of the centromeres, we  
279 conducted ChIP-seq for barley  $\alpha$ -CENH3 (Ishii et al., 2015; Sanei et al., 2011) to determine  
280 the locations of DNA sequences bound to centromeric nucleosomes. The observed CENH3  
281 ChIP-seq peaks fell together with the jump in the directionality index and also colocalized  
282 with AGAGGG arrays in all chromosomes (**Fig. 5a, c, d; Supplementary Figs. 4-9**). For most  
283 chromosomes, several additional CENH3 peaks were observed in the pericentromeric  
284 region. Both the satellite array and the ChIP-seq peaks were narrow, spanning tens of  
285 kilobases at the most (cumulatively less than 200 kb for all peaks at a single centromere),  
286 and there were only 17-54 of *cereba* retroelements in the 10 Mb regions around the  
287 directionality breakpoints. This is at odds with previous estimates of about 200 *cereba*  
288 elements per barley centromere (Presting et al., 1998), corresponding to at least 1.4 Mb of  
289 sequence (Hudakova et al., 2001). The small width of the ChIP-seq peaks also contrasts to  
290 analogous results in bread wheat (*Triticum aestivum*). In this species, CENH3 ChIP-seq peaks  
291 occupy intervals of several megabases on all chromosomes (The International Wheat  
292 Genome Sequencing Consortium (IWGSC), 2018). All major ChIP-seq peaks in barley were  
293 adjacent to gaps between contigs in the pseudomolecules, spanning sequences of unknown  
294 size. None of the gaps was bridged by contigs of the optical map (**Supplementary Fig. 10**),  
295 indicating the presence of long (> 100 kb) stretches of DNA devoid of DLE-1 label sites.  
296 Nevertheless, non-aligned and sparsely labelled map overhangs of tens to more than a  
297 hundred kilobases, extending into the assumed centromeric gaps of some chromosomes  
298 support the presence of missing sequence in the pseudomolecules (**Supplementary Fig. 10**).  
299 We did not find any ONT reads spanning a centromere gap, supporting the notion that  
300 centromeres are longer than 100 kb.  
301 As sequences interacting with CENH3 may be missing from the pseudomolecules or their  
302 repetitive nature may prevent unambiguous mapping of ChIP-seq reads, we analyzed the  $\alpha$ -  
303 CENH3 ChIP-seq data in a reference-free manner using RepeatExplorer2 followed by ChIP-  
304 seq Mapper tool (Novák et al., 2020). RepeatExplorer2 uses graph-based clustering of the  
305 whole-genome shotgun (WGS) reads for characterization of repetitive DNA, resulting in a set  
306 of repeat clusters. ChIP-seq Mapper further assigns the ChIP and input reads to those repeat  
307 clusters and reports ChIP/input ratios of the normalized read counts for each cluster. The  
308 most strongly enriched sequence cluster (CL78,  $\alpha$ -CENH3-ChIP-seq/input ratio = 11) was  
309 composed of a mix of *cereba* sequences and the AGAGGG-type of satellite repeats and was  
310 estimated to occupy 0.43 % of the barley genome, i.e. 20.21 Mb, assuming a genome size of  
311 4.7 Gb (**Supplementary Fig. 11**).  
312 As an alternative approach to estimating the number of centromeric repeats, we ran TRF  
313 and BLAST alignments on the long reads of cv. Morex as we did for (sub-)telomeric repeats.  
314 The 1.4 Mb size estimate of Hudakova et al. (2001) is based on the copy number of the  
315 *cereba* integrase domain given by Presting et al. (1998). The latter authors had extrapolated  
316 from phage library screens for integrase that barley chromosomes contain on average 200  
317 *cereba* copies, each 7 kb in size. We performed BLAST searches with the 809 bp integrase  
318 domain against the HiFi reads. A total of 19,090 (25,471) reads contained a near-complete  
319 ( $\geq 800$  bp alignment length) hit at 90 % (80 %) sequence identity. Ninety-eight per cent of  
320 these reads had only a single hit, indicating that the barley lambda 9 clone of Hudakova et



321 al. (2001) with two *cereba* copies in close proximity was an exception. Assuming a 31-fold  
322 coverage, the number of *cereba* integrase copies amounts to ~100 per chromosome – an  
323 estimate on the same order of magnitude, albeit somewhat lower, than the 200 copies of  
324 Presting et al. (1998).

325 The notion that individual *cereba* copies are separated by intervening satellite arrays was  
326 supported by the TRF results for the AGAGGG satellite. A total of 3,159 HiFi reads contained  
327 a satellite array longer than 1 kb. Of these, only 13.2 % were mapped with high confidence  
328 (MAPQ = 60) to positions more than 1 Mb away from a centromere gap, 69 % were  
329 unmapped and 17.4 % mapped within 1 Mb of a centromere gap. These mapping results are  
330 concordant with the presence of FISH signals for AGAGGG only at the centromeres (Houben  
331 et al., 2007; Hudakova et al., 2001; Kapusi et al., 2012). Among the 3,159 AGAGGG-positive  
332 reads, 35.6 % contained a *cereba* integrase. BLAST alignments of the 7 kb sequence of a  
333 complete *cereba* element showed that only 19 % of integrase-positive reads had a full-  
334 length hit to *cereba*. However, partial hits ( $\geq 2000$  bp alignment length) were found for 93  
335 %, indicating that *cereba* elements may be rapidly disrupted after insertion.

336 The results for ONT reads were largely consistent with those for HiFi reads. A total of 86,708  
337 ONT reads had near-complete integrase hits at 80 % identity, which corresponds to 146  
338 copies per chromosome (assuming 85-fold coverage). Long ( $\geq 1$  kb) AGAGGG arrays were  
339 found in 67,481 ONT reads. Of the AGAGGG-positive ONT reads, only 18 % mapped more  
340 than 1 Mb away from the centromere gaps and 23 % had a BLAST alignment to the *cereba*  
341 integrase. The longest AGAGGG array found in the ONT reads spanned 95 kb; arrays longer  
342 than 30 kb were found in 346 ONT reads. These large array sizes explain the gaps found at  
343 the centromeres in the MorexV3 pseudomolecules, which were constructed from HiFi reads  
344 selected for smaller size ranges (15-22 kb) and possibly defective in their coverage of A/G  
345 rich motifs (Nurk et al., 2020). We note that while ONT reads with AGAGGG arrays longer  
346 than 1 kb amount to 2.3 Mb of non-redundant sequence, AGAGGG-positive HiFi reads can  
347 account only for 245 kb of non-redundant sequence, an observation possibly related to HiFi  
348 sequence dropout in GA-rich regions (Nurk et al., 2020).

349 A rough estimate for the average centromere sizes of barley chromosomes based on the  
350 *cereba* copy number and the *cereba* to AGAGGG ratio is as follows: 100 copies of mostly  
351 incomplete *cereba* elements with an average length of 4 kb amount to 400 kb. Alignments  
352 to *cereba* accounted for 11.5 % of the sequence of HiFi reads containing an AGAGGG array  
353 longer than 1 kb. Assuming that *cereba* elements make up one eighth of a functional  
354 centromere, the average centromere size is 3.2 Mb, similar to the estimate derived from the  
355 analysis of repeats in ChIP-seq data (20.21 Mb / 7 = 2.89 Mb). Most of this sequence is  
356 missing from the MorexV3 pseudomolecules.

357

### 358 *Size estimation of ribosomal DNA by optical maps and accurate long reads*

359

360 One of the most important functional domains in the nucleus is the nucleolar organizer  
361 region. It consists of 45S ribosomal DNA, which is arranged in long arrays of homogenous  
362 units composed of clusters of highly conserved 18S, 5.8S and 26S rRNA genes separated by  
363 intergenic spacers, whose size and sequence composition can differ between particular loci  
364 in a genome (**Fig. 6a**). To date, ribosomal DNA arrays are not present in most genome  
365 assemblies, including the most recent human reference genome GRCh38.p13 (Schneider et  
366 al., 2017).

367 We previously proposed Bionano optical mapping as a valuable tool to position and  
368 characterize particular rDNA loci (Tulpová et al., 2021) and assess their completeness in  
369 reference genomes (Kapustová et al., 2019). To figure out what portion of the 45S rDNA had  
370 been included in the reference genome, we exploited raw data used to generate the DLE-1  
371 optical map. Whole-genome profiling of DLE-1-labelled arrays with more than five units  
372 revealed three major size categories of labelled tandem repeats – 2.2-2.5 kb, 8.6-9.1 kb and  
373 9.6-10 kb (**Fig. 6b**). The sizes of the latter two corresponded to the sizes of 5H and 6H rDNA  
374 units, respectively, identified by BLAST searches in the interval 52.6-53.7 Mb on the 5H and  
375 81.9-82.4 Mb on the 6H pseudomolecule of MorexV3. These positions correspond to the  
376 major 45S rDNA loci in Morex barley (**Fig. 1**). Alignment of the 5H and 6H pseudomolecules  
377 to the DLE-1 optical map (Mascher et al., 2021) showed maps with the expected regular  
378 pattern aligned to the identified rDNA positions, but none of the maps spanned across the  
379 whole rDNA region (**Supplementary Fig. 12**). Manual inspection of the Bionano map contigs  
380 showed that the regular pattern with ~9-10-kb spacing occurred only in those aligning to the  
381 rDNA positions or in several shorter unassigned contigs that did not comprise other pattern  
382 and were distinguished by high molecule coverage. We conclude that all Bionano molecules  
383 with the ~9-10 kb pattern most likely belonged to rDNA arrays and that the spacing of 8.6-  
384 9.1 and 9.6-10 kb corresponded to 5H and 6H units, respectively (**Fig. 6c**). Analysis of a  
385 dataset totalling 1.09 Tb (232-fold coverage of the 4.7 Gb genome of Morex) assigned a  
386 total of 5.042 Gb (565,420 units) and 1.886 Gb (192,345 units) to the short and long rDNA  
387 units, respectively. We estimate that the 5H and 6H loci comprised 2,435 and 829 regularly  
388 arranged rDNA units, respectively, corresponding to 21.71 and 8.12 Mb of sequence for the  
389 5H and 6H loci, respectively. BLAST searches in the 5H pseudomolecule of MorexV3  
390 identified rDNA arrays of 102 and 48 complete units in 5H and 6H, respectively, positioned  
391 in the interval 52.6-53.7 Mb.

392 An additional 11.42 Mb of both complete and incomplete 45S rDNA units were found in  
393 unassigned scaffolds (chrUn) (**Supplementary Fig. 12**). Based on the cumulative size of these  
394 alignments and the optical map-based rDNA abundance estimate of 29.8 Mb (0.64 % of the  
395 Morex genome), at least 16 Mb of rDNA sequence are missing in the MorexV3 assembly.

396 To confirm the results from Bionano genome mapping, we estimated the abundance of 45S  
397 rDNA in our long-read data. Representative sequences of the 45S unit on chromosomes 5H  
398 and 6H, respectively, were aligned to the HiFi reads. Considering alignment longer than 5 kb  
399 with at least 90 % sequence identity, 41,228 reads with a cumulative length of 820 Mb were  
400 aligned to both the 5H and 6H unit. Only 16 reads (amounting to 213 kb) were aligned to  
401 only one of the units. Of the reads aligned to both units, 2,480 (49.8 Mb, 6 %) were assigned  
402 to locations in the MorexV3 pseudomolecules with mapping quality  $\geq 10$ , mainly to  
403 chromosomes 5H, 6H and 1H. These reads may correspond to degenerate copies close to  
404 the boundaries of the major rDNA arrays on 5H and 6H and to the degenerated minor locus  
405 on 1H. Assuming that (i) 95 % (787 Mb) of reads with hits to both units are intact sequences  
406 originating from one of the major arrays on 5H and 6H and that (ii) the average HiFi read  
407 depth is 31 (**Supplementary Fig. 1**), we arrive at an estimated size of 25.4 Mb of both arrays  
408 combined. This sequence-based estimate is 15 % smaller than the one based on the Bionano  
409 map.

410 To assess the representation of 5S rDNA, we aligned its 120 bp coding sequence (Fukui et  
411 al., 1994) to the HiFi reads and the MorexV3 pseudomolecules (**Fig. 7**). We found 9,971 hits  
412 with > 90 % identity and > 100 bp alignment. Of these, 6,586 were on chr2H in the interval  
413 575-577 Mb. Smaller arrays were found on chromosomes 4H (573 Mb, 256 copies) and 7H

414 (250 Mb, 967 copies). Isolated hits (< 20 copies) were reported on chromosomes 1H, 3H and  
415 5H. A large number (2138 copies) were on unassigned contigs. A total of 321,943 hits to the  
416 HiFi reads were reported, equivalent to ~10,400 unique copies at 31-fold coverage. This  
417 indicates that the majority of 5S rDNA gene copies are represented in the MorexV3  
418 assembly, although ~21 % of them are on contigs not assigned to a chromosomal location.

419

420 *Most sequence gaps are due to repeat arrays*

421

422 Our analyses so far have shown long, homogeneous satellite repeat arrays are represented  
423 only incompletely in the MorexV3 pseudomolecules. We asked ourselves how many other  
424 sequence gaps can be attributed to long stretches of low-complexity DNA. TRF identifies all  
425 repeat arrays with a maximum motif size of 2 kb. We inspected ONT reads for the presence  
426 of long (> 20 kb) repeat arrays, which cannot be spanned by HiFi reads. Longer ONT reads  
427 may span entire gaps or at least enable the positioning of long arrays by the presence of a  
428 single-copy sequence at least at one end of a read. Among the most abundant motifs  
429 identified by TRF in the ONT reads were the trinucleotide microsatellites AAC, AAG, ACT and  
430 ATC. A total of 7,655 reads contained trinucleotide arrays longer than 20 kb. The longest  
431 array with 50,473 AAG copies spanned 153 kb. Trinucleotide microsatellites had been  
432 mapped using FISH by Cuadrado and Jouve (2007). Unique sequences adjacent to repeat  
433 arrays made it possible to assign repeat-containing ONT reads to chromosomal locations  
434 (**Fig. 3d-g**). Consistent with the previous FISH mapping, AAC and AAG were most abundant  
435 in pericentric regions of all chromosomes; ACT showed signals on multiple chromosomes at  
436 different distances from the centromeres; ATC had its strongest signals in the pericentric  
437 region of 4H. A strong signal for AAG in the ONT reads mapped to interstitial regions of 7H in  
438 MorexV3 was not observed in the FISH experiments of Cuadrado and Jouve (2007), who  
439 worked with cv. Plaisant.

440 In addition to arrays with short motifs, TRF reported also 26,556 ONT reads with arrays  
441 longer than 20 kb and consensus motif lengths above 100 bp. The majority of these (78.6 %)  
442 were assigned with high confidence (MAPQ >= 60) to unique positions in the MorexV3  
443 pseudomolecules. The longest array annotated by TRF had 562 copies of a 327 bp motif with  
444 high homology to pAS1, spanned 186 kb and mapped 13 Mb away from the distal end of  
445 3HL. We checked whether mapped satellite arrays colocalized with gaps in the MorexV3  
446 pseudomolecules. A scan for tandem repeats in the 1 kb flanking regions of all sequence  
447 gaps with TRF found arrays longer than 500 bp in 99 of 147 (65 %) of them. Detected motifs  
448 were 2 to 472 bp in size (**Fig. 7**). Trinucleotides were the most common class; 58 gaps were  
449 close to pericentromeric AAG. Apart from trinucleotides, the second most abundant class  
450 were 118 bp monomers with high homology to the subtelomeric repeat HvT01. Among four  
451 large (> 15 kb) insertions of chloroplast DNA into the nuclear genome, only one coincided  
452 with a sequence gap (**Fig. 7**). These results are consistent with an enrichment of sequence  
453 gaps in distal and pericentromeric regions of the pseudomolecules (**Fig. 7, Supplementary**  
454 **Fig. 1-3**). Taken together, our analyses suggest that the resolution of long low complexity  
455 sequences will be the greatest challenge in obtaining T2T assemblies of barley  
456 chromosomes.

457

458 **Discussion**

459

460 We have shown that the repeat arrays of telomeres, subtelomeres, centromeres and 5S and  
461 45S rDNA loci are not represented in their entirety in the current barley reference genome  
462 sequence assembly (MorexV3). The predominant cause of sequence assembly breakdown is  
463 the presence of long, homogeneous tandem repeat arrays that cannot be resolved with  
464 reads in the 20 – 100 kb size range and that were also not bridged by contigs of the optical  
465 map because DLE-1 label sites were absent from most repeat monomers. By contrast, 45S  
466 rDNA was labelled by DLE-1, which enabled us to estimate the abundance of this repeat  
467 class in barley. The analysis indicated that regular arrays of the major rDNA loci in  
468 chromosomes 5H and 6H spanned over ~21 and ~8 Mb, respectively, and such tandemly  
469 organized repetitive sequence cannot be assembled from data obtained by current  
470 sequencing and optical mapping technologies whose read lengths exceed 1 Mb only in rare  
471 cases. Nevertheless, the presence of marginal parts of the arrays in the assembly, the  
472 availability of core rDNA units for each of the major loci and a known quantity of units in  
473 each array entertain the possibility of resolving these loci by similar approaches as applied in  
474 the T2T assembly of human CHM13 cell line (Nurk et al., 2021).

475 Our analysis of unassembled repeat sequences cannot explain the discrepancy between  
476 assembly size and most flow-cytometric genome size estimates. Even generously rounding  
477 up and doubling size estimates for the loci we studied here can account for less than 150  
478 Mb of missing sequence: telomeres 1 Mb; subtelomeres and pericentromeres 60 Mb;  
479 ribosomal DNA 40 Mb; and centromeres 40 Mb. However, the difference between the  
480 assembly size and the flow-cytometric estimates amounts to 500-800 Mb, i.e. the equivalent  
481 of at least an entire barley chromosome. We did not observe in either long- or short-read  
482 datasets extended regions with a read depth elevated above the genome-wide average,  
483 ruling out the presence of large segmental duplications of low-copy sequence. Doležel et al.  
484 (2018) pointed out that their genome size estimates for barley cv. Morex of 4.88 Gbp and  
485 5.04 Gbp, respectively, were obtained assuming a human genome size of 3.257 Gb  
486 (GRCh38.p12) and 3.423 Gb (Tiersch et al., 1989), respectively. Recently, Nurk et al. (2021)  
487 reported T2T assemblies of all chromosomes in the essentially homozygous human cell line  
488 CHM13, amounting to a total assembly size of 3,054,815,472 bp – shorter than either  
489 human GSE considered by Doležel et al. (2018). Applying this value yields barley 1C genome  
490 size of 4.58 Gb, which is considerably closer to the MorexV3 assembly size and GSEs from  
491 long and short reads. The present report focuses on the (as yet incomplete) genome of a  
492 single species and cannot provide strong evidence either in favor of or against a revision of  
493 flow cytometric size standards. A conclusion in this matter can be drawn only after gapless  
494 genome sequences of several plant and animal species have been assembled or if CHM13  
495 could be used as a standard for flow cytometric estimates.

496 Additional datasets are needed to construct T2T assemblies of barley chromosomes. It may  
497 be arguable whether determining copy numbers of all satellite arrays should be prioritized  
498 over other research aims addressable by high-throughput sequencing, e.g. expanding the  
499 barley pan-genome. However, we are convinced that the complete sequence of a barley  
500 centromere would be an important achievement. Near-gapless assembly of the *Arabidopsis*  
501 *thaliana* genome (Naish et al., 2021) enabled epigenomic profiling of centromeres and  
502 analysis of transposon insertion patterns. The completion of a centromere of *H. vulgare*  
503 would be an important first step towards the comparative sequence and epigenetic analysis  
504 of centromere evolution in the genus *Hordeum* and its relation to speciation. Size estimates  
505 by us and prior studies (Houben et al., 2007; Presting et al., 1998) indicate that barley  
506 centromeres are at least one, possibly three Mb or more in size. Ultra-long ONT reads in the

507 size range of 100 kb – 1 Mb (Prall et al., 2021) might cover a large fraction (5 – 50 %) of a  
508 barley centromere. We expect random insertions of *cereba* elements and their subsequent  
509 degradation to generate unique patterns in otherwise homogeneous AGAGGG arrays. If  
510 reads are long enough to bridge the space between two *cereba* elements, it may be possible  
511 to resolve the assembly graphs of barley centromeres into a gapless linear sequence.  
512 Another idea is to use epigenetic marks gleaned from long-read sequencing (Gershman et  
513 al., 2021) to differentiate between regions identical in DNA sequence.  
514 Knowledge from prior studies using cytological and molecular biology methods has greatly  
515 helped in the interpretation of our results. In particular, the near-absence of centromeric  
516 sequence might have been hard to ascertain without knowledge of the sequence  
517 organization of barley centromeres (Hudakova et al., 2001; Presting et al., 1998). Hi-C  
518 contact matrices enabled the precise localization of centromeres, but it would have been  
519 difficult to identify *cereba* as a centromere-specific retrotransposon as the majority of  
520 *cereba* elements are absent from the sequence assembly. Without FISH mapping of  
521 chloroplast probes, we would not have been able to rule out the presence of large  
522 chloroplast insertion into the nuclear genomes. This illustrates the importance of  
523 complementary methods such as FISH mapping of candidate repeat sequences and ChIP-seq  
524 with antibodies for centromeric nucleosomes in assessing assembly completeness.  
525 In this study, we applied an *ad hoc* approach based on BLAST alignment of known motifs to  
526 long-reads and *de novo* predictions with TRF to estimate the abundance of tandem repeat  
527 arrays. Several methods have been developed to annotate repeats in error-prone long-  
528 reads, e.g. the Noise Cancelling Repeat Finder to annotate satellite repeats in noisy long  
529 reads (Harris et al., 2019). We deem it a worthwhile subject for future research to develop  
530 an analysis toolkit for reference-free repeat prediction and abundance estimation in  
531 accurate long-reads similar to the RepeatExplorer2 (Novák et al., 2020) analysis suite for  
532 short-read data. Assembly-free repeat analysis from low-coverage (5x) long-read could  
533 underpin a more comprehensive assessment of composition and abundance of all classes of  
534 tandem repeats, including long satellite arrays that are difficult to study with short reads.

535

## 536 **Methods**

537

### 538 *Public datasets used in the study*

539

540 The MorexV3 assembly is accessible from the European Nucleotide Archive (ENA) under  
541 project ID PRJEB40589 and from the Plant Genomics & Phenomics Research Data Repository  
542 (PGP, Arend et al. (2016), <http://doi.org/10.5447/ipk/2021/3>). The ENA accessions for HiFi,  
543 ONT and PE450 reads are PRJEB40587, PRJEB40588 and PRJEB31444, respectively. The  
544 Bionano optical map is available from PGP (<http://doi.org/10.5447/ipk/2021/2>). Repeat  
545 monomer sequences of HvT01 were downloaded from NCBI (X16095.1:1-118); pAS1 was  
546 read from Figure 4 of Brandes et al. (1995). The *cereba* integrase domain was extracted  
547 from AY040832.1 based on the sequence shown in Figure 2 of Presting et al. (1998). For 5S  
548 rDNA, we used 120 bp (the 5S rRNA gene sequence) from GenBank accession S70723.1.

549

### 550 *Extraction of 5H- and 6H-specific 45S rDNA units*

551

552 Representative units of 5H and 6H rDNA loci were extracted from unassigned contigs of  
553 MorexV3 assembly using a two-step procedure. First, 86 and 48 complete but heterogenous

554 rDNA units found in marginal parts of 45S rDNA arrays present in 5H and 6H  
555 pseudomolecule, respectively, were used to construct consensual 5H and 6H units. The  
556 chromosome-specific consensuses were then applied for BLAST search in unassigned contigs  
557 (chrUn) of the MorexV3 presumed to harbor collapsed homogenous units forming cores of  
558 the major rDNA arrays. We identified 264 and 25 identical rDNA monomers for the 5H and  
559 6H variants, respectively, which we used as representative units for the 5H and 6H loci.

560

#### 561 *Read mapping to MorexV3 and genome size estimation with k-mers*

562

563 HiFi, ONT and PE450 were aligned to the MorexV3 pseudomolecules with Minimap2 version  
564 2.17 (Li, 2018) using the presets map-pb, map-ont and sr, respectively. PE450 were  
565 processed with cutadapt (Martin, 2011) prior to alignment. Alignment records were  
566 converted to Binary Alignment Map (BAM) format using SAMtools (Li et al., 2009) and  
567 sorted with Novosort (<http://www.novocraft.com/products/novosort/>). Read depth was  
568 calculated with SAMtools and aggregated in 1 kb windows with BEDtools (Quinlan and Hall,  
569 2010). Summary statistics and GSEs were calculated in R (R Core Team, 2017). Genome size  
570 estimation based on *k*-mer spectra was done for HiFi, ONT and PE40 reads with findGSE  
571 (Sun et al., 2018) using Jellyfish (Marçais and Kingsford, 2011) for *k*-mer counting.

572

#### 573 *Tandem repeat annotation and quantification in long-reads*

574

575 Tandem repeats were identified with Tandem Repeat Finder (TRF, Benson (1999)) using the  
576 parameter setting “2 5 7 80 10 50 2000 -l 1 -h”. Read files in FASTQ format were converted  
577 to FASTA format with seqtk (<https://github.com/lh3/seqtk>). GNU Parallel (Tange, 2018) was  
578 used to process reads in parallel. TRF was run on HiFi reads, ONT reads, the MorexV3  
579 pseudomolecules, and 1 kb flanking regions of MorexV3 gaps. Prior to further analysis,  
580 detected motifs were converted to a canonical form, namely the lexically minimal sequence  
581 among all cyclic shifts of the motif and its reverse complement. For example, GAG is  
582 synonymous with CTC, CCT, TCC, GGA and AGG; AGG is the canonical motif. Summary  
583 statistics were calculated and plots were generated using functions of the R statistical  
584 environment (R Core Team, 2017).

585

#### 586 *Quantification of repeats in long-reads by sequence alignment*

587 Monomer sequences of repeat arrays were aligned to different references using BLASTN  
588 (Altschul et al., 1990) with default parameters (BLAST+, version 2.2.30). The references  
589 were: the MorexV3 pseudomolecules, HiFi reads, ONT reads and 1 kb flanking regions of  
590 gaps in MorexV3. Overlapping alignments were merged with BEDTools (Quinlan and Hall,  
591 2010). Statistical analysis was done in R (R Core Team, 2017).

592

#### 593 *Quantification of 45S ribosomal DNA with Bionano map data*

594 Regular arrays of 45S rDNA units can be recognized and quantified in optical maps  
595 generated on the Saphyr platform (Bionano Genomics, San Diego, USA) thanks to the  
596 presence of a DLE-1 labelled site in the 26S rRNA gene, which generates a regular pattern  
597 with ~9 - 10 kb label spacing (Figure 6a). The units were quantified from size-filtered (>150  
598 kb) raw (single-molecule) data of DLE-1 optical map of barley cv. Morex (Mascher et al.  
599 2021), applying a RefAligner (Bionano Genomics) function simpleRepeatStandalone and  
600 repeat stretch tolerance of 0.1. Arrays of six and more repeat units were considered. Unit

601 size estimates obtained from the optical map data were corrected using the coefficient of  
602 0.952 to eliminate error due to 4.8 % expansion of the optical map compared to the  
603 sequence, calculated from a sequence-to-map alignment. The resulting rmap file was  
604 analyzed in Microsoft Excel and unit size and number of units were plotted in a histogram  
605 for visual analysis.

606

#### 607 *ChIP-seq*

608 Nuclei were isolated as described previously (Neumann et al., 2012) from *Hordeum vulgare*  
609 cv. Morex 4 days-germinated embryos. ChIP-seq protocol from the same publication was  
610 followed with minor modifications using the anti-barley  $\alpha$ -CENH3 antibody (Sanei et al.,  
611 2011). Briefly, nuclei isolated from 4 g tissue were centrifuged at 600 g for 15 min at 4°C and  
612 resuspended in 1 ml micrococcal nuclease (MNase) buffer (10% sucrose, 50 mM Tris-HCl pH  
613 7.5, 4 mM MgCl<sub>2</sub>, 1 mM CaCl<sub>2</sub>, 1x protease inhibitor cocktail (cOmplete™ Roche)), divided  
614 into 10 aliquots and digested with the range of MNase amounts (NEB M0247S, 500-2000 GU  
615 of the enzyme per aliquot) for 10 min at 37°C, yielding fragments within the range between  
616 mono- and tetra-nucleosomal size. The reactions were stopped by adding 0.5 M EDTA to a  
617 final concentration of 20 mM and samples were pooled and centrifuged at 13,000 g for 5  
618 min at 4°C. The supernatant containing well-digested chromatin was saved while the pellet  
619 containing poorly digested chromatin was redigested with 500 units of MNase for 5 min at  
620 37°C in 200  $\mu$ l MNase buffer. The reaction was stopped with EDTA and centrifuged as  
621 described above. The chromatin fractions were pooled, resulting in >75% consisting of  
622 mononucleosomes, and diluted with the same volume of ChIP incubation buffer (20 mM Tris  
623 pH 7.5, 140 mM NaCl, 1 mM EDTA pH8, 1% Triton X-100, 0.1% sodium deoxycholate, 0.1%  
624 sodium dodecyl sulfate (SDS), 1x protease inhibitor). A 50  $\mu$ l aliquot was taken for DNA  
625 isolation to serve as an input control sample. Antibody binding was done for 2 h at 4°C in  
626 200  $\mu$ l of PBS buffer with 0.01% Tween-20 containing 30  $\mu$ l magnetic beads and 9  $\mu$ g of the  
627 antibody. The beads with bound antibody were mixed with the chromatin and the mixture  
628 was incubated with rotation overnight at 4°C. Immunoprecipitated complexes were washed  
629 3x5 min using 800  $\mu$ l of the ChIP incubation buffer, followed by two washes with the ChIP  
630 incubation buffer containing 300mM NaCl and two washes with TE buffer. Elution of the  
631 chromatin was done using 2x100  $\mu$ l of elution buffer (1 % SDS in TE with proteinase K) for 15  
632 min at 55°C. DNA from the ChIP and input control samples was isolated using ChIP DNA  
633 Clean and Concentrator Kit (Zymo Research, Irvine, CA) to prepare sequencing libraries using  
634 NEBnext Ultra II kit (NEB). Paired-end sequencing was done on S1 flow-cell using NovaSeq.

635

#### 636 *ChIP-seq data analysis*

637 Raw ChIP-seq reads were trimmed to 120 bp, and adapters and low-quality reads were  
638 removed by TrimGalore (<https://github.com/FelixKrueger/TrimGalore>). Trimmed reads were  
639 mapped to the MorexV3 reference with Minimap2 (Li, 2018). Alignment records were  
640 converted to BAM format with SAMtools (Li et al., 2009) and sorted and deduplicated with  
641 Novosort (<http://www.novocraft.com/products/novosort/>). The counts of uniquely  
642 mapped, non-duplicated reads (samtools view -q 20 -F 3332) were aggregated in 1 kb  
643 windows for visualization. The enrichment of repetitive sequences in the ChIP-seq data was  
644 evaluated using RepeatExplorer2 followed by ChIP-seq Mapper, both integrated at the  
645 Galaxy server (<https://repeatexplorer-elixir.cerit-sc.cz/galaxy/>). First, the repetitive DNA  
646 cluster database was generated by RepeatExplorer2 using similarity-based clustering of  
647 2x100 bp WGS Illumina reads (SRA accession ERR125905). ChIP and Input reads were then

648 mapped to contigs resulting from the clustering, and the CENH3-enriched clusters were  
649 determined based on CHIP/Input reads elevated ratio.

650

### 651 *Fluorescence in situ hybridization (FISH)*

652

653 Chromosome spreads of barley cv. Morex was prepared as described by Aliyeva-Schnorr et  
654 al. (2015). The barley cpDNA-bearing BAC clone ChHB040G01 (Martis et al., 2012),  
655 subtelomeric satellite repeat HvT01 (Belostotsky and Ananiev, 1990b) and 45S rDNA  
656 containing clone pTa71 (Gerlach and Bedbrook, 1979) were labelled with dUTP-ATTO550,  
657 dUTP-ATTO488 and dUTP-ATTO647, respectively, as FISH probes using nick translation  
658 labelling kits (Jena Bioscience). Before hybridization, slides were treated with 45% acetic  
659 acid at RT for 10 min, followed by 0.1% pepsin/ 0.01 N HCl at 37°C for 10 min and post-fixed  
660 in 4% paraformaldehyde nat RT for 10 min. The hybridization mixture contained 50% (v/v)  
661 formamide, 10% (w/v) dextran sulfate, 2× SSC and 5 ng/μl of each probe. Chromosomal  
662 DNAs and probes were denatured at 75°C for 2 min, followed by hybridization at 37°C for  
663 20-24 hr. The final stringent wash was performed in 2× SSC at 57°C for 20 min and slides  
664 were dehydrated in 70-90-100% ethanol series for 3 min each. Chromosomes were  
665 counterstained by 10 μg/ml 4',6-diamidino-2-phenylindole (DAPI) in Vectashield antifade  
666 mounting medium (Vector Laboratories). Images were captured using an epifluorescence  
667 microscope BX61 (Olympus) equipped with a cooled CCD camera (Orca ER, Hamamatsu) and  
668 pseudocolored using Adobe Photoshop CS6.

669

### 670 **Accession codes**

671 CENH3 CHIP-seq data are accessible from the European Nucleotide Archive (ENA,  
672 <https://www.ebi.ac.uk/ena>) under project ID PRJEBXXX.

673

### 674 **Author contributions**

675

676 MM, HŠ, NS, AH, JD conceived the study. HT, ZT and HŠ collected and analyzed optical  
677 mapping data. PN performed CHIP-seq experiments. PN and MM analyzed sequence data.  
678 AH contributed CENH3 antibodies. YTK performed FISH. MM, PN and HŠ wrote the paper  
679 with input from all co-authors.

680

### 681 **Acknowledgments**

682

683 This research was supported by the grant MITOCHROM jointly funded by the German  
684 Research Foundation (DFG, grant MA 6611/4-1 to M.M.) and the Czech Science Foundation  
685 (GAČR, grant 18-14450J to J.D.). Further support was provided by the German Ministry of  
686 Education and Research (BMBF) in frame of the grants SHAPE II (FKZ 031B0884 to N.S. and  
687 M.M.) and by GAČR (grant 17-17564S to H.Š.) We sincerely thank Petr Novák from The  
688 Institute of Plant Molecular Biology, Biology Centre CAS for valuable discussions on  
689 RepeatExplorer data analysis. Computational resources were provided by the project "e-  
690 Infrastruktura CZ" (e-INFRA LM2018140) provided within the program Projects of Large  
691 Research, Development and Innovations Infrastructures and ELIXIR-CZ project (LM2018131),  
692 part of the international ELIXIR infrastructure.

693

694



695 **Figures**

696

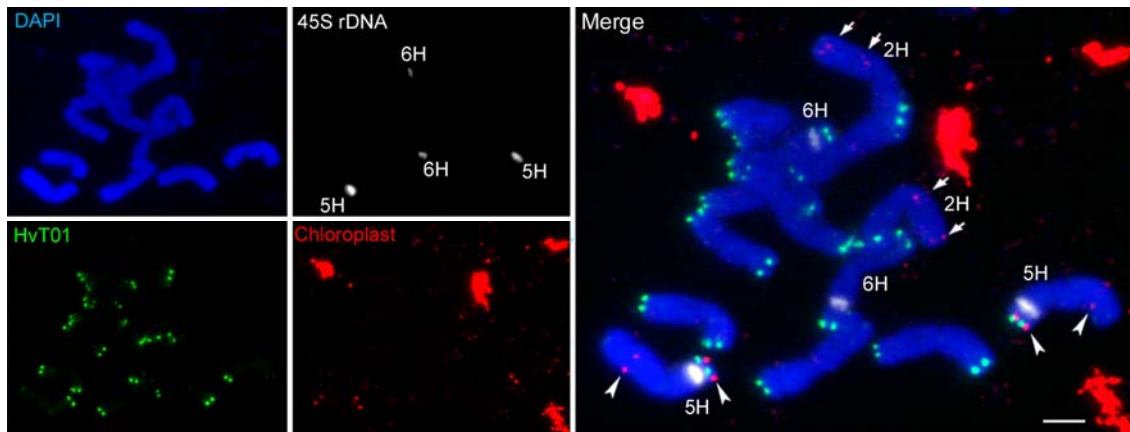

697

698

699 **Figure 1: FISH mapping of chloroplast insertions into the nuclear genome of barley cv.**

700 **Morex.** Chloroplast DNA (red), subtelomeric satellite HvT01 (green) and 45S rDNA (white)

701 were mapped on metaphase chromosomes. Chloroplast derived DNA insertions are

702 detected on chromosome 2H (*arrows*) and 5H (*arrowheads*). Non-chromosomal chloroplast

703 DNA signals represent plastids. Chromosomes were counterstained by DAPI. Scale bar = 5

704  $\mu\text{m}$ .

705

706

707

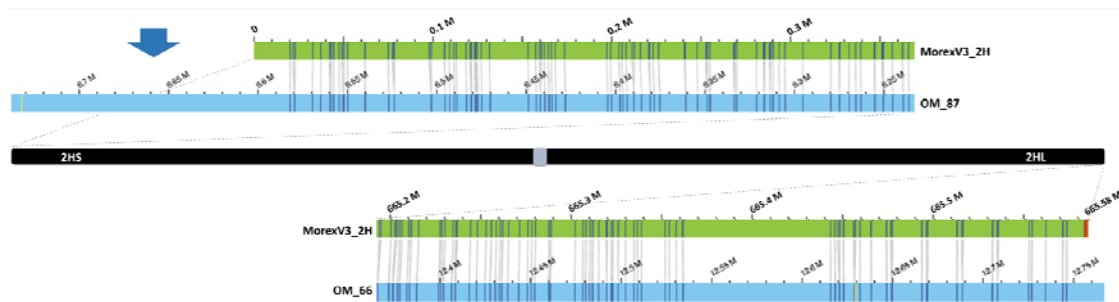

708

709

710 **Figure 2. Alignments of the termini of the 2H optical map and sequence assembly reveal**

711 **missing sequence.** The optical map (blue bar) was aligned to the 2H pseudomolecule

712 sequence (green bar). Vertical grey lines connect matching DLE-1 label sites (CTTAAG motif).

713 The optical map extends beyond the 2H sequence at the short arm (2HS) terminus (blue

714 arrow), indicating a minimum of 140 kb missing sequence, while at the long arm (2HL)

715 terminus, the sequence contains 3.6 kb of a regular telomeric motif (TTTAGGG, marked by

716 red stripes) belonging to a functional telomere. Long label-free map segments at both

717 termini suggest the presence of unlabelled subtelo-meric satellite repeats.

718

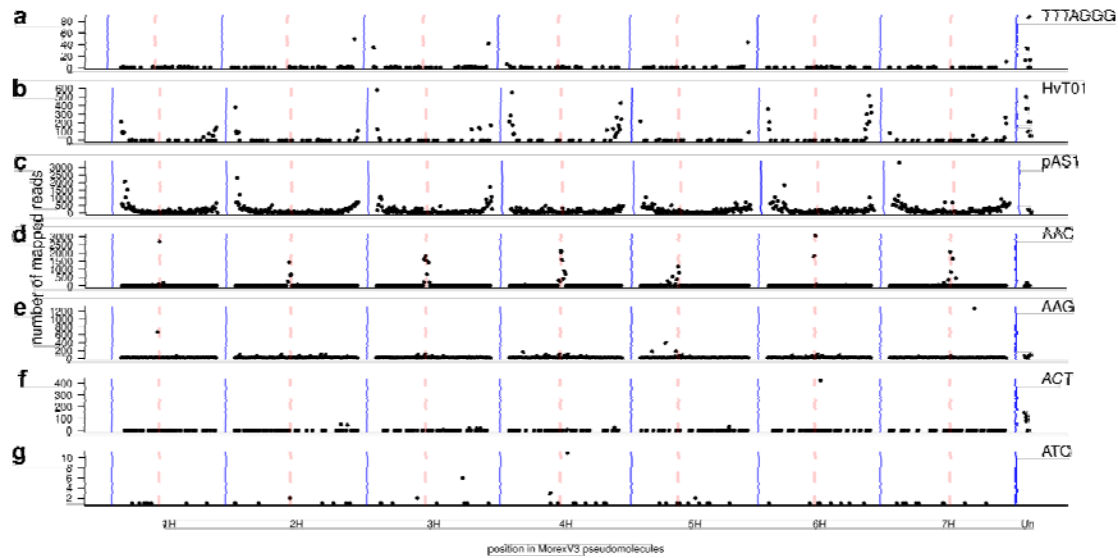

719

720

721 **Figure 3: Locations of known satellite arrays in the MorexV3 pseudomolecules.** Known  
722 repeat sequences were annotated in read sequences. Telomeric repeats (TTTAGGG, **(a)**)  
723 and trinucleotide microsatellites (**(d-g)**) were identified with Tandem Repeat Finder in ONT  
724 reads; subtelomeric repeats [Hvt01 **(b)** and pAS1 **(c)**] were found by BLAST against HiFi  
725 reads. The counts of reads containing these repeats and mapped uniquely to positions in  
726 the MorexV3 pseudomolecules were aggregated in 5 Mb windows and plotted along the  
727 genome. Dashed red lines mark centromeres.

728

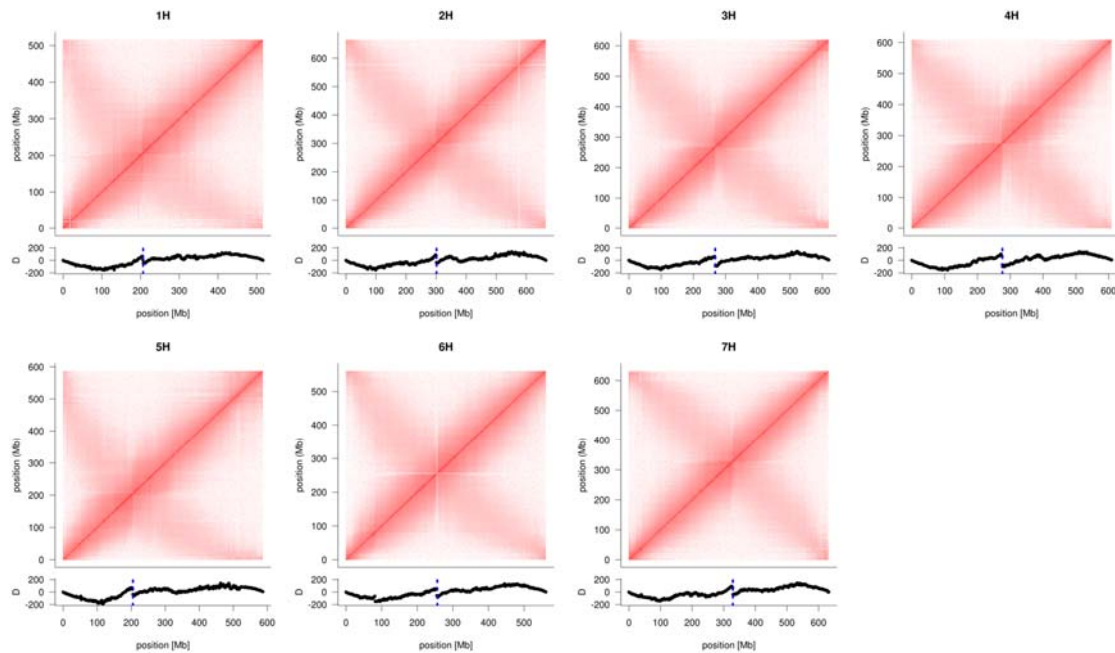

729

730

731 **Figure 4: Positioning of centromeres by inspection of Hi-C contact matrices.**

732 Intrachromosomal Hi-C contact matrices for the seven barley chromosomes were computed

733 from alignment of Hi-C reads to the MorexV3 pseudomolecules. The intensity of the red

734 color is proportional to the contact probability. Below each contact matrix is shown the

735 directionality bias (excess of up- or downstream Hi-C links) along the chromosomes.

736 Discontinuities coinciding with the intersection points of the diagonals and anti-diagonals

737 mark putative centromeres locations (marked by blue dotted line).

738

739

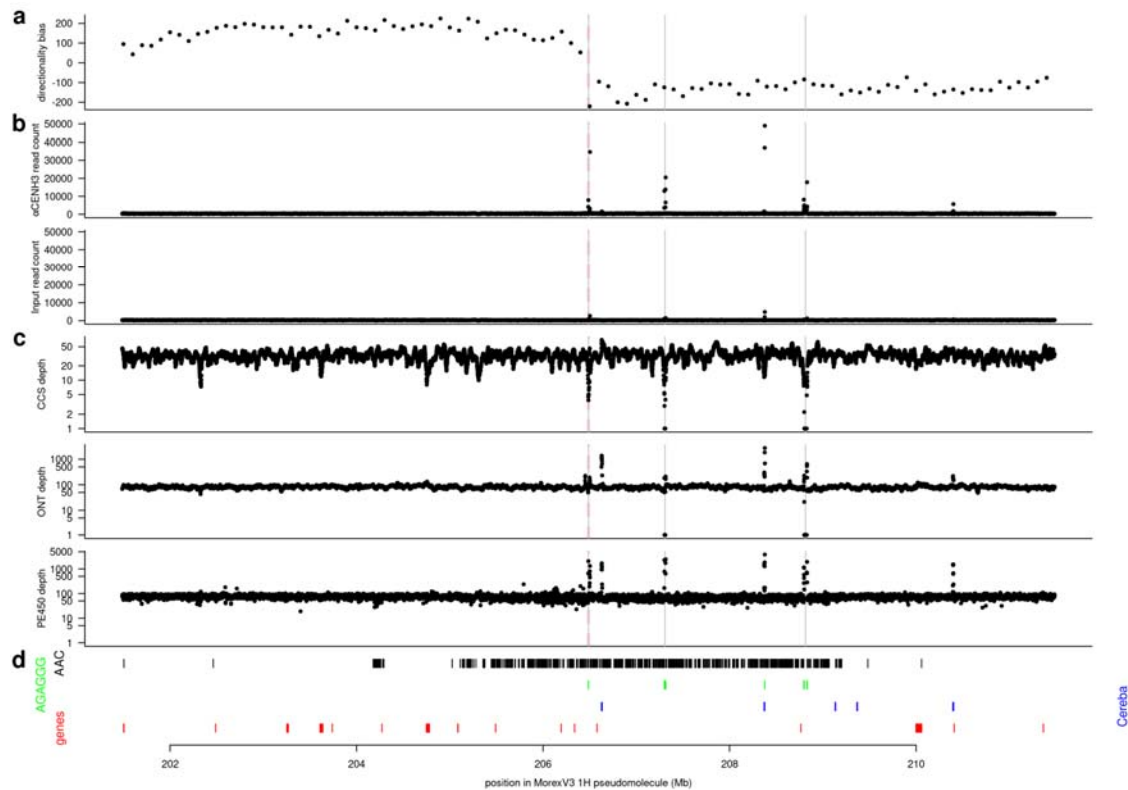

740  
741  
742  
743  
744  
745  
746  
747  
748  
749  
750  
751

**Figure 5: Sequence organization of the pericentromeric region of chromosome 1H.** A 10 Mb region flanking (+/- 5 Mb) a gap likely containing the functional centromere are shown. In panels (a)-(c), the centromere is indicated by a dashed red line; gaps in the pseudomolecules are marked by vertical gray lines. (a) Directionality bias in non-overlapping 100 kb windows. (b) Read depth in CENH3 ChIP-seq data and the input controls. Data from two biological replicates were summed. (c) Read depth in HiFi, ONT and PE450 data. (d) Position of (i) AAC (black) and AGAGGG (green) satellite arrays; (ii) Cereba elements (blue); (iii) genes (red). Analogous plots for chromosome 2H to 7H are shown in **Supplementary Figs. 4-9**.

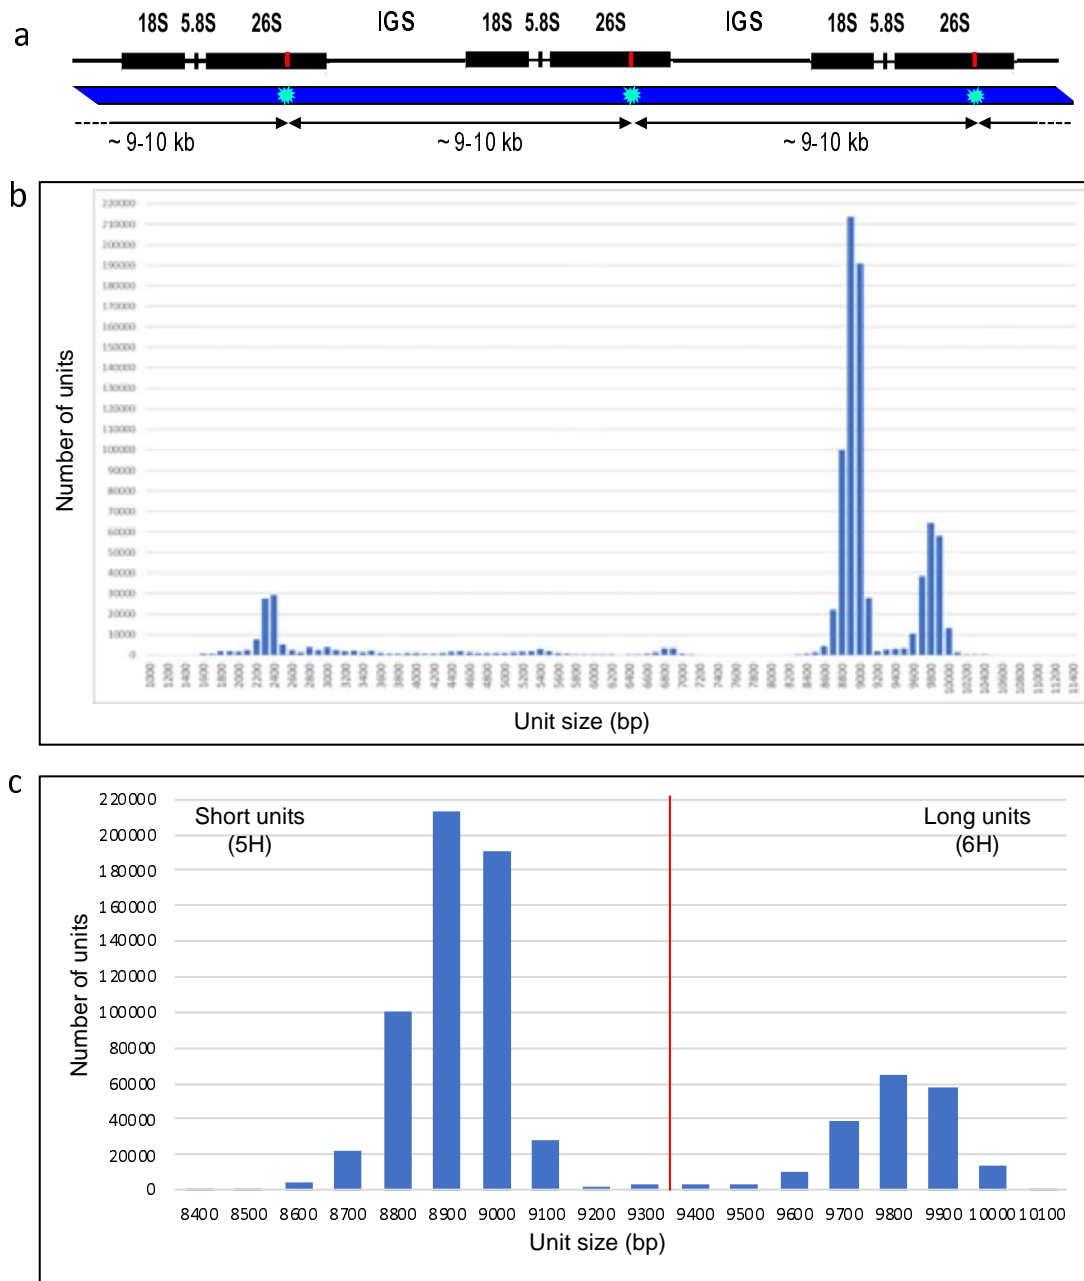

752  
753

754 **Figure 6: Profiling of 45S rDNA tandem repeats in optical map data.** (a) 45S rDNA arrays  
755 are composed of clusters of 18S, 5.8S and 26S rRNA genes separated by intergenic spacers  
756 (IGS) whose lengths differ between 5H (total unit size ~8.9 kb) and 6H (total unit size ~9.8  
757 kb) rDNA loci. Labelling at DLE-1 site in the 26S rRNA gene (red line) generates a regular  
758 pattern in the optical map with a label spacing of ~9-10 kb (bottom). (b) Size distribution of  
759 DLE-1-labelled tandem repeats in Morex optical map raw data >150 kb, considering repeat  
760 arrays >5 units. The dataset totals 1.09 Tb corresponding to 237-fold coverage of the barley  
761 genome. (c) The size category of 8,400-10,100 bp belongs to 45S ribosomal DNA.  
762

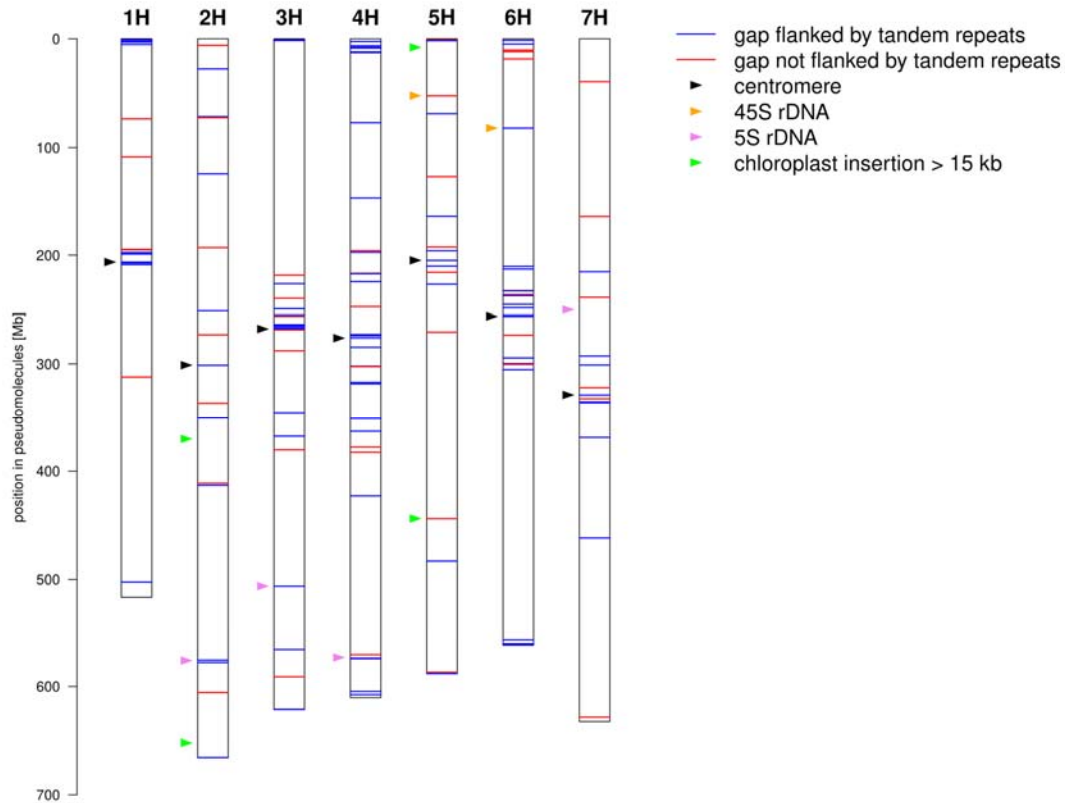

763

764

765 **Figure 7: Sequence gaps in the MorexV3 pseudomolecules.** The positions of sequence gaps

766 are shown along the pseudomolecules. Gaps are colored according to whether or not at

767 least one of their 1 kb flanking regions contain tandem repeat arrays longer than 500 bp.

768 The positions of centromeres, 5S and 45S ribosomal DNA loci and large (> 15 kb)

769 insertions of plastidal DNA are marked by colored arrowheads.

770

771

772 **Tables**

773

774 **Table 1: Summary statistics and genome size estimates (GSE) from different sequence**  
775 **datasets.**

|                                                 | HiFi <sup>1</sup> | ONT <sup>1</sup> | PE450 <sup>1</sup> |
|-------------------------------------------------|-------------------|------------------|--------------------|
| <b>Number of reads</b>                          | 6.6 M             | 32.5 M           | 684.6 M            |
| <b>Sequenced base pairs</b>                     | 132.7 G           | 426.9 G          | 364.2 G            |
| <b>Proportion of aligned reads</b>              | 100.0%            | 98.9%            | 98.5%              |
| <b>Mean depth</b>                               | 31.4              | 94.3             | 81.8               |
| <b>Median depth</b>                             | 31                | 85.2             | 76.2               |
| <b>Mode depth</b>                               | 31.3              | 84.3             | 76.4               |
| <b>GSE based on read depth (Gb)<sup>4</sup></b> | 4.3               | 5.0              | 4.8                |
| <b>GSE based on 21-mer spectra (Gb)</b>         | 2.9               | 0.3              | 3.8                |
| <b>GSE based on 51-mer spectra (Gb)</b>         | 4.2               | -                | 4.3                |
| <b>GSE based on 101-mer spectra (Gb)</b>        | 4.3               | -                | -                  |

776

777 <sup>1</sup>HiFi: PacBio HiFi reads (accurate long reads); ONT Oxford Nanopore long reads; PE450  
778 2x250 bp Illumina reads of fragments with an average size of 450 bp.

779 <sup>4</sup>The genome size estimate was calculated as the number of sequenced base pairs divided  
780 by the median depth.

781

782 **Table 2. Completeness of MorexV3 assembly in telomeric regions**

| Chromosome | Optical map overhang <sup>1</sup> |          | Telomeric repeats <sup>2</sup> in sequence <sup>2</sup> (kb) |          |
|------------|-----------------------------------|----------|--------------------------------------------------------------|----------|
|            | Short arm                         | Long arm | Short arm                                                    | Long arm |
|            | <b>1H</b>                         | 100      | -                                                            | -        |
| <b>2H</b>  | 140                               | 10       | -                                                            | 3.6788   |
| <b>3H</b>  | 220                               | -        | -                                                            | 13.7789  |
| <b>4H</b>  | 154                               | -        | -                                                            | +790     |
| <b>5H</b>  | 20                                | 10       | -                                                            | 5791     |
| <b>6H</b>  | 70                                | 80       | -                                                            | -793     |
| <b>7H</b>  | 17                                | -        | -                                                            | -794     |

796

797 <sup>1</sup>Terminal part of the optical map extending beyond the start/end of a pseudomolecule,  
798 indicating a missing sequence.

799 <sup>2</sup>Presence of an interspersed (subtelomeric) array of TTTAGGG repeats is marked by +.  
800 Lengths are given for regular telomeric arrays only.

801

802

803 **Supplementary Items**

804

805

806 **Supplementary Figure 1:** Read depth in HiFi reads.

807

808 **Supplementary Figure 2:** Read depth in ONT reads.

809

810 **Supplementary Figure 3:** Read depth in PE450 reads.

811

812 **Supplementary Figure 4:** Sequence organization of the pericentromeric region of  
813 chromosome 2H.

814

815 **Supplementary Figure 5:** Sequence organization of the pericentromeric region of  
816 chromosome 3H.

817

818 **Supplementary Figure 6:** Sequence organization of the pericentromeric region of  
819 chromosome 4H.

820

821 **Supplementary Figure 7:** Sequence organization of the pericentromeric region of  
822 chromosome 5H.

823

824 **Supplementary Figure 8:** Sequence organization of the pericentromeric region of  
825 chromosome 6H.

826

827 **Supplementary Figure 9:** Sequence organization of the pericentromeric region of  
828 chromosome 7H.

829

830 **Supplementary Figure 10:** (Peri)centromeric region of chromosome 2H in the optical map.

831

832 **Supplementary Figure 11:**  $\alpha$ -CENH3-ChIP-Seq Mapper analysis.

833

834 **Supplementary Figure 12.** 45S ribosomal DNA in Morex V3 assembly.

835



836 **References**

837

838 Aliyeva-Schnorr, L., Ma, L. and Houben, A. (2015) A Fast Air-dry Dropping Chromosome  
839 Preparation Method Suitable for FISH in Plants. *J Vis Exp*, e53470.

840 Aliyeva-Schnorr, L., Stein, N. and Houben, A. (2016) Collinearity of homoeologous group 3  
841 chromosomes in the genus *Hordeum* and *Secale cereale* as revealed by 3H-derived  
842 FISH analysis. *Chromosome Research* **24**, 231-242.

843 Altschul, S.F., Gish, W., Miller, W., Myers, E.W. and Lipman, D.J. (1990) Basic local alignment  
844 search tool. *J Mol Biol* **215**, 403-410.

845 Arend, D., Junker, A., Scholz, U., Schüler, D., Wylie, J. and Lange, M. (2016) PGP repository: a  
846 plant phenomics and genomics data publication infrastructure. *Database* **2016**.

847 Belostotsky, D.A. and Ananiev, E.V. (1990a) Characterization of relic DNA from barley  
848 genome. *Theor Appl Genet* **80**, 374-380.

849 Belostotsky, D.A. and Ananiev, E.V. (1990b) Characterization of Relic DNA from Barley  
850 Genome. *Theoretical and Applied Genetics* **80**, 374-380.

851 Belser, C., Baurens, F.-C., Noel, B., Martin, G., Cruaud, C., Istace, B., Yahiaoui, N., Labadie, K.,  
852 Hřibová, E., Doležel, J., Lemainque, A., Wincker, P., D'Hont, A. and Aury, J.-M. (2021)  
853 Telomere-to-telomere gapless chromosomes of banana using nanopore sequencing.  
854 *Communications Biology* **4**, 1047.

855 Benson, G. (1999) Tandem repeats finder: a program to analyze DNA sequences. *Nucleic  
856 Acids Res* **27**, 573-580.

857 Brandes, A., Röder, M.S. and Ganai, M.W. (1995) Barley telomeres are associated with two  
858 different types of satellite DNA sequences. *Chromosome Research* **3**, 315-320.

859 Cowan, C.R., Carlton, P.M. and Cande, W.Z. (2001) The Polar Arrangement of Telomeres in  
860 Interphase and Meiosis. Rab1 Organization and the Bouquet. *Plant Physiology* **125**,  
861 532.

862 Cuadrado, A. and Jouve, N. (2007) The nonrandom distribution of long clusters of all  
863 possible classes of trinucleotide repeats in barley chromosomes. *Chromosome  
864 Research* **15**, 711-720.

865 Dixon, J.R., Selvaraj, S., Yue, F., Kim, A., Li, Y., Shen, Y., Hu, M., Liu, J.S. and Ren, B. (2012)  
866 Topological domains in mammalian genomes identified by analysis of chromatin  
867 interactions. *Nature* **485**, 376-380.

868 Doležel, J. and Bartoš, J. (2005) Plant DNA Flow Cytometry and Estimation of Nuclear  
869 Genome Size. *Annals of Botany* **95**, 99-110.

870 Doležel, J., Čížková, J., Šimková, H. and Bartoš, J. (2018) One Major Challenge of Sequencing  
871 Large Plant Genomes Is to Know How Big They Really Are. *Int J Mol Sci* **19**.

872 Doležel, J. and Greilhuber, J. (2010) Nuclear genome size: Are we getting closer? *Cytometry  
873 Part A* **77A**, 635-642.

874 Fukui, K., Kamisugi, Y. and Sakai, F. (1994) Physical mapping of 5S rDNA loci by direct-cloned  
875 biotinylated probes in barley chromosomes. *Genome* **37**, 105-111.

876 Gerlach, W.L. and Bedbrook, J.R. (1979) Cloning and Characterization of Ribosomal-Rna  
877 Genes from Wheat and Barley. *Nucleic Acids Research* **7**, 1869-1885.

878 Gershman, A., Sauria, M.E.G., Hook, P.W., Hoyt, S.J., Razaghi, R., Koren, S., Altemose, N.,  
879 Caldas, G.V., Vollger, M.R., Logsdon, G.A., Rhie, A., Eichler, E.E., Schatz, M.C., O'Neill,  
880 R.J., Phillippy, A.M., Miga, K.H. and Timp, W. (2021) Epigenetic Patterns in a  
881 Complete Human Genome. *bioRxiv*, 2021.2005.2026.443420.

- 882 Harris, R.S., Cechova, M. and Makova, K.D. (2019) Noise-cancelling repeat finder: uncovering  
883 tandem repeats in error-prone long-read sequencing data. *Bioinformatics* **35**, 4809-  
884 4811.
- 885 Himmelbach, A., Ruban, A., Walde, I., Šimková, H., Doležel, J., Hastie, A., Stein, N. and  
886 Mascher, M. (2018) Discovery of multi-megabase polymorphic inversions by  
887 chromosome conformation capture sequencing in large-genome plant species. *The*  
888 *Plant Journal*.
- 889 Houben, A., Schroeder-Reiter, E., Nagaki, K., Nasuda, S., Wanner, G., Murata, M. and Endo,  
890 T.R. (2007) CENH3 interacts with the centromeric retrotransposon cereba and GC-  
891 rich satellites and locates to centromeric substructures in barley. *Chromosoma* **116**,  
892 275-283.
- 893 Hudakova, S., Michalek, W., Presting, G.G., ten Hoopen, R., dos Santos, K., Jasencakova, Z.  
894 and Schubert, I. (2001) Sequence organization of barley centromeres. *Nucleic Acids*  
895 *Res* **29**, 5029-5035.
- 896 Ishii, T., Karimi-Ashtiyani, R., Banaei-Moghaddam, A.M., Schubert, V., Fuchs, J. and Houben,  
897 A. (2015) The differential loading of two barley CENH3 variants into distinct  
898 centromeric substructures is cell type- and development-specific. *Chromosome*  
899 *Research* **23**, 277-284.
- 900 Jiao, Y., Peluso, P., Shi, J., Liang, T., Stitzer, M.C., Wang, B., Campbell, M.S., Stein, J.C., Wei,  
901 X., Chin, C.S., Guill, K., Regulski, M., Kumari, S., Olson, A., Gent, J., Schneider, K.L.,  
902 Wolfgruber, T.K., May, M.R., Springer, N.M., Antoniou, E., McCombie, W.R., Presting,  
903 G.G., McMullen, M., Ross-Ibarra, J., Dawe, R.K., Hastie, A., Rank, D.R. and Ware, D.  
904 (2017) Improved maize reference genome with single-molecule technologies. *Nature*  
905 **546**, 524-527.
- 906 Kapusi, E., Ma, L., Teo, C.H., Hensel, G., Himmelbach, A., Schubert, I., Mette, M.F., Kumlehn,  
907 J. and Houben, A. (2012) Telomere-mediated truncation of barley chromosomes.  
908 *Chromosoma* **121**, 181-190.
- 909 Kapustová, V., Tulpová, Z., Toegelová, H., Novák, P., Macas, J., Karafiátová, M., Hřibová, E.,  
910 Doležel, J. and Šimková, H. (2019) The Dark Matter of Large Cereal Genomes: Long  
911 Tandem Repeats. *International journal of molecular sciences* **20**, 2483.
- 912 Kilian, A., Stiff, C. and Kleinhofs, A. (1995) Barley telomeres shorten during differentiation  
913 but grow in callus culture. *Proceedings of the National Academy of Sciences* **92**, 9555.
- 914 Leitch, I.J. and Heslop-Harrison, J.S. (1992) Physical mapping of the 18S–5.8S–26S rRNA  
915 genes in barley by in situ hybridization. *Genome* **35**, 1013-1018.
- 916 Leitch, I.J. and Heslop-Harrison, J.S. (1993) Physical mapping of four sites of 5S rDNA  
917 sequences and one site of the  $\alpha$ -amylase-2 gene in barley (*Hordeum vulgare*).  
918 *Genome* **36**, 517-523.
- 919 Li, H. (2018) Minimap2: pairwise alignment for nucleotide sequences. *Bioinformatics* **1**, 7.
- 920 Li, H., Handsaker, B., Wysoker, A., Fennell, T., Ruan, J., Homer, N., Marth, G., Abecasis, G.  
921 and Durbin, R. (2009) The sequence alignment/map format and SAMtools.  
922 *Bioinformatics* **25**, 2078-2079.
- 923 Li, X. and Waterman, M.S. (2003) Estimating the repeat structure and length of DNA  
924 sequences using L-tuples. *Genome Res* **13**, 1916-1922.
- 925 Lieberman-Aiden, E., van Berkum, N.L., Williams, L., Imakaev, M., Ragoczy, T., Telling, A.,  
926 Amit, I., Lajoie, B.R., Sabo, P.J., Dorschner, M.O., Sandstrom, R., Bernstein, B.,  
927 Bender, M.A., Groudine, M., Gnirke, A., Stamatoyannopoulos, J., Mirny, L.A., Lander,

- 928 E.S. and Dekker, J. (2009) Comprehensive Mapping of Long-Range Interactions  
929 Reveals Folding Principles of the Human Genome. *Science* **326**, 289.
- 930 Liu, J., Seetharam, A.S., Chougule, K., Ou, S., Swentowsky, K.W., Gent, J.I., Llaca, V.,  
931 Woodhouse, M.R., Manchanda, N., Presting, G.G., Kudrna, D.A., Alabady, M., Hirsch,  
932 C.N., Fengler, K.A., Ware, D., Michael, T.P., Hufford, M.B. and Dawe, R.K. (2020)  
933 Gapless assembly of maize chromosomes using long-read technologies. *Genome*  
934 *Biology* **21**, 121.
- 935 Logsdon, G.A., Vollger, M.R., Hsieh, P., Mao, Y., Liskovych, M.A., Koren, S., Nurk, S., Mercuri,  
936 L., Dishuck, P.C., Rhie, A., de Lima, L.G., Dvorkina, T., Porubsky, D., Harvey, W.T.,  
937 Mikheenko, A., Bzikadze, A.V., Kremitzki, M., Graves-Lindsay, T.A., Jain, C.,  
938 Hoekzema, K., Murali, S.C., Munson, K.M., Baker, C., Sorensen, M., Lewis, A.M., Surti,  
939 U., Gerton, J.L., Larionov, V., Ventura, M., Miga, K.H., Phillippy, A.M. and Eichler, E.E.  
940 (2021) The structure, function and evolution of a complete human chromosome 8.  
941 *Nature* **593**, 101-107.
- 942 Marçais, G. and Kingsford, C. (2011) A fast, lock-free approach for efficient parallel counting  
943 of occurrences of k-mers. *Bioinformatics* **27**, 764-770.
- 944 Marie, D. and Brown, S.C. (1993) A cytometric exercise in plant DNA histograms, with 2C  
945 values for 70 species. *Biology of the Cell* **78**, 41-51.
- 946 Martin, M. (2011) Cutadapt removes adapter sequences from high-throughput sequencing  
947 reads. *EMBnet. Journal* **17**, pp. 10-12.
- 948 Martis, M.M., Klemme, S., Banaei-Moghaddam, A.M., Blattner, F.R., Macas, J., Schmutzer,  
949 T., Scholz, U., Gundlach, H., Wicker, T., Simkova, H., Novak, P., Neumann, P.,  
950 Kubalaková, M., Bauer, E., Haseneyer, G., Fuchs, J., Dolezel, J., Stein, N., Mayer, K.F.  
951 and Houben, A. (2012) Selfish supernumerary chromosome reveals its origin as a  
952 mosaic of host genome and organellar sequences. *Proc Natl Acad Sci U S A* **109**,  
953 13343-13346.
- 954 Mascher, M., Gundlach, H., Himmelbach, A., Beier, S., Twardziok, S.O., Wicker, T., Radchuk,  
955 V., Dockter, C., Hedley, P.E., Russell, J., Bayer, M., Ramsay, L., Liu, H., Haberer, G.,  
956 Zhang, X.Q., Zhang, Q., Barrero, R.A., Li, L., Taudien, S., Groth, M., Felder, M., Hastie,  
957 A., Simkova, H., Stankova, H., Vrana, J., Chan, S., Munoz-Amatriain, M., Ounit, R.,  
958 Wanamaker, S., Bolser, D., Colmsee, C., Schmutzer, T., Aliyeva-Schnorr, L., Grasso, S.,  
959 Tanskanen, J., Chailyan, A., Sampath, D., Heavens, D., Clissold, L., Cao, S., Chapman,  
960 B., Dai, F., Han, Y., Li, H., Li, X., Lin, C., McCooke, J.K., Tan, C., Wang, P., Wang, S., Yin,  
961 S., Zhou, G., Poland, J.A., Bellgard, M.I., Borisjuk, L., Houben, A., Dolezel, J., Ayling, S.,  
962 Lonardi, S., Kersey, P., Langridge, P., Muehlbauer, G.J., Clark, M.D., Caccamo, M.,  
963 Schulman, A.H., Mayer, K.F.X., Platzer, M., Close, T.J., Scholz, U., Hansson, M., Zhang,  
964 G., Braumann, I., Spannagl, M., Li, C., Waugh, R. and Stein, N. (2017) A chromosome  
965 conformation capture ordered sequence of the barley genome. *Nature* **544**, 427-433.
- 966 Mascher, M., Wicker, T., Jenkins, J., Plott, C., Lux, T., Koh, C.S., Ens, J., Gundlach, H., Boston,  
967 L.B., Tulpová, Z., Holden, S., Hernández-Pinzón, I., Scholz, U., Mayer, K.F.X., Spannagl,  
968 M., Pozniak, C.J., Sharpe, A.G., Šimková, H., Moscou, M.J., Grimwood, J., Schmutz, J.  
969 and Stein, N. (2021) Long-read sequence assembly: a technical evaluation in barley.  
970 *Plant Cell*.
- 971 Miga, K.H., Koren, S., Rhie, A., Vollger, M.R., Gershman, A., Bzikadze, A., Brooks, S., Howe, E.,  
972 Porubsky, D., Logsdon, G.A., Schneider, V.A., Potapova, T., Wood, J., Chow, W.,  
973 Armstrong, J., Fredrickson, J., Pak, E., Tigyi, K., Kremitzki, M., Markovic, C., Maduro,  
974 V., Dutra, A., Bouffard, G.G., Chang, A.M., Hansen, N.F., Wilfert, A.B., Thibaud-

- 975 Nissen, F., Schmitt, A.D., Belton, J.-M., Selvaraj, S., Dennis, M.Y., Soto, D.C.,  
976 Sahasrabudhe, R., Kaya, G., Quick, J., Loman, N.J., Holmes, N., Loose, M., Surti, U.,  
977 Risques, R.a., Graves Lindsay, T.A., Fulton, R., Hall, I., Paten, B., Howe, K., Timp, W.,  
978 Young, A., Mullikin, J.C., Pevzner, P.A., Gerton, J.L., Sullivan, B.A., Eichler, E.E. and  
979 Phillippy, A.M. (2020) Telomere-to-telomere assembly of a complete human X  
980 chromosome. *Nature* **585**, 79-84.
- 981 Monat, C., Padmarasu, S., Lux, T., Wicker, T., Gundlach, H., Himmelbach, A., Ens, J., Li, C.,  
982 Muehlbauer, G.J., Schulman, A.H., Waugh, R., Braumann, I., Pozniak, C., Scholz, U.,  
983 Mayer, K.F.X., Spannagl, M., Stein, N. and Mascher, M. (2019) TRITEX: chromosome-  
984 scale sequence assembly of Triticeae genomes with open-source tools. *Genome Biol*  
985 **20**, 284.
- 986 Naish, M., Alonge, M., Wlodzimierz, P., Tock, A.J., Abramson, B.W., Lambing, C.A., Kuo, P.,  
987 Yelina, N., Hartwick, N., Colt, K., Kakutani, T., Martienssen, R.A., Bousios, A., Michael,  
988 T.P., Schatz, M.C. and Henderson, I.R. (2021) The genetic and epigenetic landscape of  
989 the Arabidopsis centromeres. *bioRxiv*, 2021.2005.2030.446350.
- 990 Neumann, P., Navrátilová, A., Schroeder-Reiter, E., Koblížková, A., Steinbauerová, V.,  
991 Chocholová, E., Novák, P., Wanner, G. and Macas, J. (2012) Stretching the Rules:  
992 Monocentric Chromosomes with Multiple Centromere Domains. *PLOS Genetics* **8**,  
993 e1002777.
- 994 Novák, P., Neumann, P. and Macas, J. (2020) Global analysis of repetitive DNA from  
995 unassembled sequence reads using RepeatExplorer2. *Nature Protocols* **15**, 3745-  
996 3776.
- 997 Nurk, S., Koren, S., Rhie, A., Rautiainen, M., Bzikadze, A.V., Mikheenko, A., Vollger, M.R.,  
998 Altemose, N., Uralsky, L., Gershman, A., Aganezov, S., Hoyt, S.J., Diekhans, M.,  
999 Logsdon, G.A., Alonge, M., Antonarakis, S.E., Borchers, M., Bouffard, G.G., Brooks,  
1000 S.Y., Caldas, G.V., Cheng, H., Chin, C.-S., Chow, W., de Lima, L.G., Dishuck, P.C.,  
1001 Durbin, R., Dvorkina, T., Fiddes, I.T., Formenti, G., Fulton, R.S., Functamman, A.,  
1002 Garrison, E., Grady, P.G.S., Graves-Lindsay, T.A., Hall, I.M., Hansen, N.F., Hartley,  
1003 G.A., Haukness, M., Howe, K., Hunkapiller, M.W., Jain, C., Jain, M., Jarvis, E.D.,  
1004 Kerpedjiev, P., Kirsche, M., Kolmogorov, M., Korf, J., Kremitzki, M., Li, H., Maduro,  
1005 V.V., Marschall, T., McCartney, A.M., McDaniel, J., Miller, D.E., Mullikin, J.C., Myers,  
1006 E.W., Olson, N.D., Paten, B., Peluso, P., Pevzner, P.A., Porubsky, D., Potapova, T.,  
1007 Rogae, E.I., Rosenfeld, J.A., Salzberg, S.L., Schneider, V.A., Sedlazeck, F.J., Shafin, K.,  
1008 Shew, C.J., Shumate, A., Sims, Y., Smit, A.F.A., Soto, D.C., Sović, I., Storer, J.M.,  
1009 Streets, A., Sullivan, B.A., Thibaud-Nissen, F., Torrance, J., Wagner, J., Walenz, B.P.,  
1010 Wenger, A., Wood, J.M.D., Xiao, C., Yan, S.M., Young, A.C., Zarate, S., Surti, U.,  
1011 McCoy, R.C., Dennis, M.Y., Alexandrov, I.A., Gerton, J.L., O'Neill, R.J., Timp, W., Zook,  
1012 J.M., Schatz, M.C., Eichler, E.E., Miga, K.H. and Phillippy, A.M. (2021) The complete  
1013 sequence of a human genome. *bioRxiv*, 2021.2005.2026.445798.
- 1014 Nurk, S., Walenz, B.P., Rhie, A., Vollger, M.R., Logsdon, G.A., Grothe, R., Miga, K.H., Eichler,  
1015 E.E., Phillippy, A.M. and Koren, S. (2020) HiCanu: accurate assembly of segmental  
1016 duplications, satellites, and allelic variants from high-fidelity long reads. *Genome*  
1017 *Research* **30**, 1291–1305.
- 1018 Pfenninger, M., Schönnenbeck, P. and Schell, T. (2021) Precise estimation of genome size  
1019 from NGS data. *bioRxiv*, 2021.2005.2018.444645.

- 1020 Pflug, J.M., Holmes, V.R., Burrus, C., Johnston, J.S. and Maddison, D.R. (2020) Measuring  
1021 Genome Sizes Using Read-Depth, k-mers, and Flow Cytometry: Methodological  
1022 Comparisons in Beetles (Coleoptera). *G3: Genes/Genomes/Genetics* **10**, 3047.
- 1023 Prall, T.M., Neumann, E.K., Karl, J.A., Shortreed, C.G., Baker, D.A., Bussan, H.E., Wiseman,  
1024 R.W. and O'Connor, D.H. (2021) Consistent ultra-long DNA sequencing with  
1025 automated slow pipetting. *BMC Genomics* **22**, 182.
- 1026 Presting, G.G., Malysheva, L., Fuchs, J. and Schubert, I. (1998) A TY3/GYPSY retrotransposon-  
1027 like sequence localizes to the centromeric regions of cereal chromosomes. *The Plant*  
1028 *Journal* **16**, 721-728.
- 1029 Quinlan, A.R. and Hall, I.M. (2010) BEDTools: a flexible suite of utilities for comparing  
1030 genomic features. *Bioinformatics* **26**, 841-842.
- 1031 R Core Team (2017) R: A language and environment for statistical computing. R Foundation  
1032 for Statistical Computing, Vienna, Austria. 2016.
- 1033 Rabl, C. (1885) Über Zellteilung//Morphologisches Jahrbuch. 1885. V **10**, 214.
- 1034 Röder, M.S., Lapitan, N.L., Sorrells, M.E. and Tanksley, S.D. (1993) Genetic and physical  
1035 mapping of barley telomeres. *Mol Gen Genet* **238**, 294-303.
- 1036 Sanei, M., Pickering, R., Kumke, K., Nasuda, S. and Houben, A. (2011) Loss of centromeric  
1037 histone H3 (CENH3) from centromeres precedes uniparental chromosome  
1038 elimination in interspecific barley hybrids. *Proc Natl Acad Sci U S A* **108**, E498-505.
- 1039 Schneider, V.A., Graves-Lindsay, T., Howe, K., Bouk, N., Chen, H.C., Kitts, P.A., Murphy, T.D.,  
1040 Pruitt, K.D., Thibaud-Nissen, F., Albracht, D., Fulton, R.S., Kremitzki, M., Magrini, V.,  
1041 Markovic, C., McGrath, S., Steinberg, K.M., Auger, K., Chow, W., Collins, J., Harden,  
1042 G., Hubbard, T., Pelan, S., Simpson, J.T., Threadgold, G., Torrance, J., Wood, J.M.,  
1043 Clarke, L., Koren, S., Boitano, M., Peluso, P., Li, H., Chin, C.S., Phillippy, A.M., Durbin,  
1044 R., Wilson, R.K., Flicek, P., Eichler, E.E. and Church, D.M. (2017) Evaluation of GRCh38  
1045 and de novo haploid genome assemblies demonstrates the enduring quality of the  
1046 reference assembly. *Genome Res* **27**, 849-864.
- 1047 Schubert, I., Shi, F., Fuchs, J. and Endo, T.R. (1998) An efficient screening for terminal  
1048 deletions and translocations of barley chromosomes added to common wheat. *The*  
1049 *Plant Journal* **14**, 489-495.
- 1050 Sun, H., Ding, J., Piednoel, M. and Schneeberger, K. (2018) findGSE: estimating genome size  
1051 variation within human and Arabidopsis using k-mer frequencies. *Bioinformatics* **34**,  
1052 550-557.
- 1053 Sun, H., Jiao, W.-B., Krause, K., Campoy, J.A., Goel, M., Folz-Donahue, K., Kukat, C., Huettel,  
1054 B. and Schneeberger, K. (2021) Chromosome-scale and haplotype-resolved genome  
1055 assembly of a tetraploid potato cultivar. *bioRxiv*, 2021.2005.2015.444292.
- 1056 Szakács, E. and Molnár-Láng, M. (2007) Development and molecular cytogenetic  
1057 identification of new winter wheat--winter barley ('Martonvásári 9 kr1' - 'Igr1')  
1058 disomic addition lines. *Genome* **50**, 43-50.
- 1059 Talbert, P.B. and Henikoff, S. (2020) What makes a centromere? *Experimental Cell Research*  
1060 **389**, 111895.
- 1061 Tange, O. (2018) Gnu Parallel. DOI: <https://doi.org/10.5281/zenodo.1146014>.
- 1062 The International Wheat Genome Sequencing Consortium (IWGSC) (2018) Shifting the limits  
1063 in wheat research and breeding using a fully annotated reference genome. *Science*  
1064 **361**, eaar7191.

- 1065 Tiersch, T.R., Chandler, R.W., Wachtel, S.S. and Elias, S. (1989) Reference standards for flow  
1066 cytometry and application in comparative studies of nuclear DNA content. *Cytometry*  
1067 **10**, 706-710.
- 1068 Tulpová, Z., Kovařík, A., Toegelová, H., Navrátilová, P., Kapustová, V., Hřibová, E., Vrána, J.,  
1069 Macas, J., Doležel, J. and Šimková, H. (2021) Anatomy, transcription dynamics and  
1070 evolution of wheat ribosomal RNA loci deciphered by a multi-omics approach.  
1071 *bioRxiv*, 2020.2008.2029.273623.
- 1072 Vaikonen, J.P.T. (1994) Natural Genes and Mechanisms for Resistance to Viruses in  
1073 Cultivated and Wild Potato Species (*Solanum* spp.). *Plant Breeding* **112**, 1-16.
- 1074 Vurture, G.W., Sedlazeck, F.J., Nattestad, M., Underwood, C.J., Fang, H., Gurtowski, J. and  
1075 Schatz, M.C. (2017) GenomeScope: fast reference-free genome profiling from short  
1076 reads. *Bioinformatics (Oxford, England)* **33**, 2202-2204.
- 1077 Zhang, X., Zhang, S., Zhao, Q., Ming, R. and Tang, H. (2019) Assembly of allele-aware,  
1078 chromosomal-scale autopolyploid genomes based on Hi-C data. *Nature Plants* **5**,  
1079 833-845.
- 1080 Zhou, Q., Tang, D., Huang, W., Yang, Z., Zhang, Y., Hamilton, J.P., Visser, R.G.F., Bachem,  
1081 C.W.B., Robin Buell, C., Zhang, Z., Zhang, C. and Huang, S. (2020) Haplotype-resolved  
1082 genome analyses of a heterozygous diploid potato. *Nature Genetics* **52**, 1018-1023.  
1083
